# Supplementary material
Source: publisher figshare collection journal article supplement (https://gsajournals.figshare.com/ndownloader/files/20276274)
Supplement: Supplementary file 1 [file 20276274]

## Sheet: groupI_DEGs_CHH_increase
FileS8.1: SeqCap promoter methylation ratios for Mop1 ABA abd Mop1 MS in the CHH context. The promoter region was defined as 2 kb upstream of the TSS. Promoter bins start at 20 (0 Kb from TSS) and end at 0 (2 Kb from TSS).
gene_id	chr	start	stop	strand	promoter_bin	methylation_context	ratio_Mop1_ABA	coverage_Mop1_ABA	sites_Mop1_ABA	ratio_Mop1_MS	coverage_Mop1_MS	sites_Mop1_MS	%_meth_diff(Mop1_ABA-Mop1_MS)*100
Zm00001d000002	B73V4_ctg150	205735	205835	-	10	CHH	0.05	2	24	0.0127551	16	24	4
Zm00001d000002	B73V4_ctg150	206135	206235	-	6	CHH	0.0925926	5	11	0.0491803	6	10	4
Zm00001d000002	B73V4_ctg150	205635	205735	-	11	CHH	0.0588235	2	21	0.0149254	13	21	4
Zm00001d000002	B73V4_ctg150	205435	205535	-	13	CHH	0.0357143	3	28	0.0197368	5	28	2
Zm00001d000002	B73V4_ctg150	206035	206135	-	7	CHH	0.0588235	8	19	0.0470085	11	21	1
Zm00001d000071	B73V4_ctg10	872441	872541	-	9	CHH	0.0793651	3	24	0.0113636	4	24	7
Zm00001d000224	B73V4_ctg26	186147	186247	-	6	CHH	0.0714286	3	35	0.0285714	3	26	4
Zm00001d000224	B73V4_ctg26	185447	185547	-	13	CHH	0.0186916	12	26	0.00338983	34	26	2
Zm00001d000224	B73V4_ctg26	186447	186547	-	3	CHH	0.0588235	2	21	0.0434783	2	12	2
Zm00001d000224	B73V4_ctg26	185747	185847	-	10	CHH	0.053719	9	27	0.0361446	25	27	2
Zm00001d000224	B73V4_ctg26	185947	186047	-	8	CHH	0.0456853	7	28	0.0263158	18	28	2
Zm00001d002744	2	21316652	21316752	-	14	CHH	0.370079	4	32	0.206107	4	32	16
Zm00001d002744	2	21316252	21316352	-	18	CHH	0.110442	21	24	0.0845921	41	24	3
Zm00001d002744	2	21317252	21317352	-	8	CHH	0.0679612	7	29	0.0391061	6	29	3
Zm00001d002744	2	21317152	21317252	-	9	CHH	0.0604027	11	28	0.0267857	8	28	3
Zm00001d002744	2	21317052	21317152	-	10	CHH	0.0106952	6	32	0	4	32	1
Zm00001d002744	2	21316352	21316452	-	17	CHH	0.0871287	15	33	0.075337	38	33	1
Zm00001d003275	2	38559917	38560017	+	7	CHH	0.0903614	6	27	0.0535714	8	27	4
Zm00001d003287	2	38810349	38810449	+	14	CHH	0.0881356	16	19	0.0434028	30	19	4
Zm00001d003287	2	38810449	38810549	+	15	CHH	0.0979167	15	33	0.0649652	26	33	3
Zm00001d003287	2	38809449	38809549	+	5	CHH	0.0571429	4	24	0.0229682	24	24	3
Zm00001d003287	2	38810249	38810349	+	13	CHH	0.0387097	9	17	0.0225	24	17	2
Zm00001d003287	2	38810549	38810649	+	16	CHH	0.0820896	10	28	0.0715706	18	28	1
Zm00001d003457	2	44955597	44955697	-	12	CHH	0.448	4	32	0.115607	5	32	33
Zm00001d003457	2	44954897	44954997	-	19	CHH	0.478873	2	29	0.166667	2	30	31
Zm00001d003457	2	44956197	44956297	-	6	CHH	0.26943	7	29	0.0749064	9	29	19
Zm00001d003457	2	44956097	44956197	-	7	CHH	0.491228	5	25	0.343137	4	25	15
Zm00001d003457	2	44954997	44955097	-	18	CHH	0.304054	5	28	0.16129	4	28	14
Zm00001d003457	2	44956297	44956397	-	5	CHH	0.190776	16	30	0.0583942	18	30	13
Zm00001d003457	2	44955697	44955797	-	11	CHH	0.578035	6	30	0.489451	8	30	9
Zm00001d003457	2	44956597	44956697	-	2	CHH	0.125	2	20	0.0566038	5	23	7
Zm00001d003457	2	44956497	44956597	-	3	CHH	0.115385	10	30	0.058309	11	30	6
Zm00001d003457	2	44956397	44956497	-	4	CHH	0.0861723	20	25	0.060423	13	25	3
Zm00001d003457	2	44955297	44955397	-	15	CHH	0.0526316	2	10	0.0209424	10	19	3
Zm00001d003757	2	57743141	57743241	-	7	CHH	0.0444444	2	19	0.0272109	7	21	2
Zm00001d003757	2	57742941	57743041	-	9	CHH	0.0551181	8	16	0.0357143	7	31	2
Zm00001d003760	2	57806795	57806895	-	5	CHH	0.0447154	8	31	0.0193798	8	31	3
Zm00001d003760	2	57806895	57806995	-	4	CHH	0.0560748	4	29	0.0330189	7	31	2
Zm00001d003833	2	61457311	61457411	+	16	CHH	0.025	2	17	0	2	12	3
Zm00001d003833	2	61457611	61457711	+	19	CHH	0.0206186	5	21	0	7	21	2
Zm00001d004095	2	82548589	82548689	-	6	CHH	0.0487805	2	18	0.027027	2	21	2
Zm00001d004171	2	88958175	88958275	+	13	CHH	0.0943396	4	15	0.0808081	7	15	1
Zm00001d004442	2	112220152	112220252	+	11	CHH	0.374101	6	23	0.195046	14	23	18
Zm00001d004442	2	112220252	112220352	+	12	CHH	0.306569	6	24	0.184	10	24	12
Zm00001d004442	2	112220052	112220152	+	10	CHH	0.168142	4	28	0.0588235	15	28	11
Zm00001d004442	2	112219652	112219752	+	6	CHH	0.097166	10	25	0.0481928	13	25	5
Zm00001d004442	2	112219352	112219452	+	3	CHH	0.0980392	11	18	0.044	14	18	5
Zm00001d004442	2	112219852	112219952	+	8	CHH	0.0631868	10	37	0.0218579	15	37	4
Zm00001d004442	2	112219252	112219352	+	2	CHH	0.0530726	11	34	0.0364583	17	34	2
Zm00001d004442	2	112219952	112220052	+	9	CHH	0.0681818	4	20	0.0503145	16	20	2
Zm00001d004442	2	112220452	112220552	+	14	CHH	0.0185185	2	30	0	3	21	2
Zm00001d004506	2	115651086	115651186	-	17	CHH	0.16	3	17	0.0695364	14	22	9
Zm00001d004506	2	115652286	115652386	-	5	CHH	0.0833333	2	13	0.0128205	3	30	7
Zm00001d004506	2	115651986	115652086	-	8	CHH	0.0740741	5	24	0.0319149	8	24	4
Zm00001d004506	2	115652186	115652286	-	6	CHH	0.0828729	6	32	0.04	7	32	4
Zm00001d004506	2	115650986	115651086	-	18	CHH	0.230769	5	20	0.1875	11	20	4
Zm00001d004506	2	115651486	115651586	-	13	CHH	0.0618557	5	36	0.0180723	5	36	4
Zm00001d004506	2	115652086	115652186	-	7	CHH	0.0447761	10	21	0.0226415	13	21	2
Zm00001d004564	2	118183962	118184062	-	3	CHH	0.103896	5	34	0.0775862	7	34	3
Zm00001d004564	2	118183862	118183962	-	4	CHH	0.0285714	3	22	0.00787402	6	22	2
Zm00001d004564	2	118184062	118184162	-	2	CHH	0.0454545	5	13	0.0347826	9	13	1
Zm00001d004624	2	122503462	122503562	+	20	CHH	0.0208333	3	19	0	3	35	2
Zm00001d004698	2	132001325	132001425	+	6	CHH	0.027027	3	13	0	3	29	3
Zm00001d004698	2	132001425	132001525	+	7	CHH	0.02	2	27	0	2	24	2
Zm00001d005018	2	154106880	154106980	+	13	CHH	0.0789474	3	14	0	3	14	8
Zm00001d005018	2	154107280	154107380	+	17	CHH	0.250936	8	35	0.187879	14	35	6
Zm00001d005018	2	154106780	154106880	+	12	CHH	0.047619	2	23	0	2	22	5
Zm00001d005018	2	154107380	154107480	+	18	CHH	0.202899	5	29	0.154639	10	30	5
Zm00001d005018	2	154107180	154107280	+	16	CHH	0.125	9	30	0.1	11	30	3
Zm00001d005018	2	154107480	154107580	+	19	CHH	0.310345	5	36	0.282609	8	36	3
Zm00001d005037	2	155349191	155349291	+	20	CHH	0.160714	5	21	0.077381	16	21	8
Zm00001d005609	2	180648751	180648851	+	20	CHH	0.0243902	2	27	0	2	34	2
Zm00001d005609	2	180648051	180648151	+	13	CHH	0.0126582	8	21	0	8	21	1
Zm00001d005622	2	180965527	180965627	+	20	CHH	0.209677	3	36	0.0714286	2	35	14
Zm00001d005748	2	185946280	185946380	+	19	CHH	0.0104167	3	38	0	4	38	1
Zm00001d005885	2	191772815	191772915	-	12	CHH	0.0117647	3	25	0	2	33	1
Zm00001d005885	2	191773515	191773615	-	5	CHH	0.0136986	4	18	0	4	14	1
Zm00001d005898	2	192210699	192210799	+	15	CHH	0.375	3	8	0.0833333	2	8	29
Zm00001d005898	2	192210399	192210499	+	12	CHH	0.210526	2	10	0.0615385	4	31	15
Zm00001d005898	2	192210199	192210299	+	10	CHH	0.292135	4	21	0.138728	8	23	15
Zm00001d005898	2	192210499	192210599	+	13	CHH	0.1	2	15	0	3	29	10
Zm00001d005898	2	192210299	192210399	+	11	CHH	0.148148	3	20	0.121622	8	28	3
Zm00001d006158	2	200055775	200055875	-	11	CHH	0.0103093	4	23	0	4	23	1
Zm00001d006193	2	201258576	201258676	-	7	CHH	0.327869	2	30	0.0449438	3	30	28
Zm00001d006682	2	214231798	214231898	+	19	CHH	0.285714	3	5	0.0625	3	5	22
Zm00001d006682	2	214231598	214231698	+	17	CHH	0.1	2	6	0	3	8	10
Zm00001d006682	2	214231898	214231998	+	20	CHH	0.190476	5	9	0.133333	7	9	6
Zm00001d006688	2	214471863	214471963	+	15	CHH	0.0666667	2	9	0.0158103	13	20	5
Zm00001d006688	2	214471263	214471363	+	9	CHH	0.047619	2	14	0.0175439	11	26	3
Zm00001d006688	2	214471563	214471663	+	12	CHH	0.0894495	17	26	0.0667396	35	26	2
Zm00001d006713	2	215021420	215021520	+	15	CHH	0.0178571	2	27	0	4	31	2
Zm00001d007097	2	222250622	222250722	-	19	CHH	0.0333333	5	6	0	3	7	3
Zm00001d007285	2	226813284	226813384	+	19	CHH	0.323129	12	25	0.25	16	25	7
Zm00001d007285	2	226812684	226812784	+	13	CHH	0.1	6	27	0.0365854	6	27	6
Zm00001d007285	2	226813184	226813284	+	18	CHH	0.286908	16	23	0.245174	23	23	4
Zm00001d007285	2	226812484	226812584	+	11	CHH	0.07393	9	30	0.0292208	10	30	4
Zm00001d007285	2	226812584	226812684	+	12	CHH	0.104575	11	28	0.0714286	7	28	3
Zm00001d007285	2	226812884	226812984	+	15	CHH	0.0185185	4	15	0	4	23	2
Zm00001d007285	2	226812984	226813084	+	16	CHH	0.0163399	10	32	0.00348432	9	32	1
Zm00001d007311	2	227459013	227459113	-	12	CHH	0.13245	5	32	0.0416667	4	32	9
Zm00001d007311	2	227459413	227459513	-	8	CHH	0.134454	4	28	0.05	5	28	8
Zm00001d007311	2	227459913	227460013	-	3	CHH	0.0769231	2	7	0.0294118	2	16	5
Zm00001d007311	2	227459313	227459413	-	9	CHH	0.0992366	8	17	0.0444444	5	17	5
Zm00001d007311	2	227459113	227459213	-	11	CHH	0.0740741	6	32	0.0361446	5	32	4
Zm00001d007311	2	227459213	227459313	-	10	CHH	0.0416667	6	32	0.025	6	32	2
Zm00001d007311	2	227460113	227460213	-	1	CHH	0.037037	3	32	0.0147059	3	27	2
Zm00001d007420	2	231241794	231241894	-	13	CHH	0.232558	3	16	0.16	6	16	7
Zm00001d007420	2	231242694	231242794	-	4	CHH	0.0714286	2	7	0.0344828	2	17	4
Zm00001d007469	2	232364623	232364723	-	2	CHH	0.0449438	3	34	0.00934579	3	34	4
Zm00001d007469	2	232364023	232364123	-	8	CHH	0.115385	3	19	0.0769231	4	15	4
Zm00001d007469	2	232363623	232363723	-	12	CHH	0.068306	16	23	0.0385757	29	23	3
Zm00001d007469	2	232363523	232363623	-	13	CHH	0.100756	14	28	0.0676568	22	28	3
Zm00001d007469	2	232364123	232364223	-	7	CHH	0.0306122	3	30	0.0196078	5	19	1
Zm00001d007606	2	236203714	236203814	-	8	CHH	0.452381	3	16	0.0738007	10	27	38
Zm00001d007606	2	236203914	236204014	-	6	CHH	0.333333	2	4	0.133333	2	27	20
Zm00001d007606	2	236202914	236203014	-	16	CHH	0.314465	9	18	0.217759	26	18	10
Zm00001d007606	2	236203014	236203114	-	15	CHH	0.289086	10	35	0.191197	42	35	10
Zm00001d007606	2	236203114	236203214	-	14	CHH	0.027933	5	33	0.0127916	40	33	2
Zm00001d007606	2	236202514	236202614	-	20	CHH	0.0217391	6	25	0	9	25	2
Zm00001d007876	2	241539277	241539377	-	3	CHH	0.192308	2	29	0.0363636	4	15	16
Zm00001d007876	2	241539077	241539177	-	5	CHH	0.327586	3	19	0.202247	6	15	13
Zm00001d007876	2	241538777	241538877	-	8	CHH	0.0285714	12	3	0.0169492	2	33	1
Zm00001d008199	8	971652	971752	+	15	CHH	0.278261	6	18	0.172932	15	18	11
Zm00001d008199	8	971452	971552	+	13	CHH	0.205036	10	29	0.153846	14	29	5
Zm00001d008199	8	971552	971652	+	14	CHH	0.13806	8	33	0.104628	15	33	3
Zm00001d008208	8	1235370	1235470	+	12	CHH	0.206704	7	25	0.0941176	17	25	11
Zm00001d008208	8	1234770	1234870	+	6	CHH	0.174242	5	28	0.0609756	3	28	11
Zm00001d008208	8	1235770	1235870	+	16	CHH	0.267559	21	28	0.200594	24	28	7
Zm00001d008208	8	1235670	1235770	+	15	CHH	0.119954	31	28	0.0792864	36	28	4
Zm00001d008311	8	4847953	4848053	-	13	CHH	0.236842	3	15	0.0588235	3	20	18
Zm00001d008311	8	4847653	4847753	-	16	CHH	0.0714286	5	19	0	3	26	7
Zm00001d008311	8	4847253	4847353	-	20	CHH	0.037037	2	33	0	2	33	4
Zm00001d008311	8	4847853	4847953	-	14	CHH	0.105263	8	25	0.0901639	5	25	2
Zm00001d008665	8	16422744	16422844	+	7	CHH	0.0108696	3	34	0	5	34	1
Zm00001d008665	8	16422644	16422744	+	6	CHH	0.0136986	3	24	0	6	23	1
Zm00001d008872	8	23395949	23396049	-	6	CHH	0.0434783	3	7	0	2	28	4
Zm00001d008919	8	25256513	25256613	-	14	CHH	0.191489	3	28	0.0633397	19	28	13
Zm00001d008919	8	25257313	25257413	-	6	CHH	0.0925926	2	32	0.0428571	2	38	5
Zm00001d008919	8	25256613	25256713	-	13	CHH	0.12973	12	31	0.0771165	38	31	5
Zm00001d008919	8	25256713	25256813	-	12	CHH	0.138201	20	38	0.0847589	34	38	5
Zm00001d008919	8	25257113	25257213	-	8	CHH	0.0985915	18	36	0.0543131	17	36	4
Zm00001d008919	8	25257213	25257313	-	7	CHH	0.0823529	6	28	0.0487805	8	27	3
Zm00001d008919	8	25256113	25256213	-	18	CHH	0.015625	3	20	0	2	22	2
Zm00001d008983	8	28568497	28568597	-	17	CHH	0.0172414	4	14	0	2	11	2
Zm00001d009090	8	35630608	35630708	-	7	CHH	0.1	3	7	0	5	7	10
Zm00001d009090	8	35631108	35631208	-	2	CHH	0.176966	15	24	0.0847145	23	24	9
Zm00001d009090	8	35630908	35631008	-	4	CHH	0.260417	15	19	0.20678	16	19	5
Zm00001d009090	8	35629308	35629408	-	20	CHH	0.0117647	4	22	0	2	29	1
Zm00001d009140	8	38894059	38894159	-	8	CHH	0.151515	9	19	0.103053	14	19	5
Zm00001d009140	8	38893259	38893359	-	16	CHH	0.0793651	2	32	0.0648649	6	32	1
Zm00001d009382	8	61385142	61385242	-	11	CHH	0.0961538	2	33	0	2	28	10
Zm00001d009382	8	61384842	61384942	-	14	CHH	0.122807	2	27	0.04	4	27	8
Zm00001d009382	8	61384942	61385042	-	13	CHH	0.0909091	3	22	0.0645161	3	12	3
Zm00001d009382	8	61386142	61386242	-	1	CHH	0.0571429	2	20	0.0434783	2	13	1
Zm00001d009497	8	67365678	67365778	+	3	CHH	0.0454545	2	11	0.0208333	4	11	2
Zm00001d009503	8	67746675	67746775	+	19	CHH	0.0526316	6	6	0.0235294	4	22	3
Zm00001d010380	8	112190207	112190307	-	8	CHH	0.30038	8	31	0.148526	28	31	15
Zm00001d010380	8	112190107	112190207	-	9	CHH	0.284483	4	26	0.143411	19	27	14
Zm00001d010380	8	112189407	112189507	-	16	CHH	0.194444	2	16	0.097561	3	16	10
Zm00001d010380	8	112189607	112189707	-	14	CHH	0.0526316	2	11	0	4	17	5
Zm00001d010380	8	112190507	112190607	-	5	CHH	0.0192308	3	18	0	5	24	2
Zm00001d010380	8	112190307	112190407	-	7	CHH	0.102041	10	34	0.0799112	27	34	2
Zm00001d010410	8	113395976	113396076	-	6	CHH	0.08	4	18	0.018018	6	18	6
Zm00001d010410	8	113395876	113395976	-	7	CHH	0.027027	2	30	0	2	30	3
Zm00001d010493	8	117898767	117898867	+	14	CHH	0.479487	15	26	0.375	19	26	10
Zm00001d010493	8	117898867	117898967	+	15	CHH	0.265734	21	27	0.205769	19	27	6
Zm00001d010493	8	117898667	117898767	+	13	CHH	0.193651	11	30	0.151335	22	30	4
Zm00001d010493	8	117898967	117899067	+	16	CHH	0.380137	15	20	0.363296	13	20	2
Zm00001d010493	8	117899067	117899167	+	17	CHH	0.0485437	7	28	0.03125	5	28	2
Zm00001d010499	8	118125463	118125563	+	11	CHH	0.380952	3	25	0.221198	16	28	16
Zm00001d010499	8	118125563	118125663	+	12	CHH	0.076087	5	35	0.0508167	16	35	3
Zm00001d010586	8	121036462	121036562	-	5	CHH	0.010101	7	14	0	4	14	1
Zm00001d010652	8	122977448	122977548	+	18	CHH	0.0117188	10	26	0	8	26	1
Zm00001d010698	8	124960800	124960900	-	11	CHH	0.350877	6	30	0.168675	8	30	18
Zm00001d010698	8	124960600	124960700	-	13	CHH	0.432099	6	29	0.327044	5	29	11
Zm00001d010698	8	124960700	124960800	-	12	CHH	0.3125	7	32	0.22449	11	32	9
Zm00001d010698	8	124961600	124961700	-	3	CHH	0.0208333	2	23	0	4	28	2
Zm00001d010713	8	125351658	125351758	+	7	CHH	0.169492	3	23	0	2	22	17
Zm00001d010713	8	125352358	125352458	+	14	CHH	0.138249	13	17	0.102174	27	17	4
Zm00001d010713	8	125351958	125352058	+	10	CHH	0.0869565	17	18	0.0485437	17	18	4
Zm00001d010713	8	125352058	125352158	+	11	CHH	0.0884956	9	24	0.0603448	15	24	3
Zm00001d010713	8	125352158	125352258	+	12	CHH	0.0414747	9	25	0.0131363	24	25	3
Zm00001d010713	8	125351858	125351958	+	9	CHH	0.0254237	10	24	0.0144928	6	24	1
Zm00001d010961	8	135104523	135104623	-	3	CHH	0.401869	3	31	0.211886	12	31	19
Zm00001d010961	8	135104623	135104723	-	2	CHH	0.226804	4	26	0.207469	19	26	2
Zm00001d010961	8	135104423	135104523	-	4	CHH	0.0277778	2	21	0.00684931	7	20	2
Zm00001d010961	8	135104723	135104823	-	1	CHH	0.205882	2	30	0.183246	24	32	2
Zm00001d011125	8	139737202	139737302	+	12	CHH	0.230769	2	24	0.0548446	17	32	18
Zm00001d011125	8	139737902	139738002	+	19	CHH	0.234375	3	25	0.114144	16	25	12
Zm00001d011125	8	139737402	139737502	+	14	CHH	0.0892857	2	25	0.0615385	18	26	3
Zm00001d011125	8	139737802	139737902	+	18	CHH	0.215686	2	30	0.183432	11	30	3
Zm00001d011269	8	145255571	145255671	+	4	CHH	0.0571429	2	20	0.00961539	5	20	5
Zm00001d011269	8	145255471	145255571	+	3	CHH	0.03125	2	30	0.00829875	8	30	2
Zm00001d011495	8	152338369	152338469	+	14	CHH	0.228571	7	34	0.137778	7	34	9
Zm00001d011495	8	152338469	152338569	+	15	CHH	0.163934	9	7	0.0963855	6	15	7
Zm00001d011495	8	152338869	152338969	+	19	CHH	0.0192308	4	24	0.00847458	5	24	1
Zm00001d011700	8	159182275	159182375	-	5	CHH	0.0952381	3	16	0	2	22	10
Zm00001d011700	8	159182675	159182775	-	1	CHH	0.05	4	38	0.00540541	5	34	4
Zm00001d012068	8	167589571	167589671	-	11	CHH	0.0222222	3	16	0	3	31	2
Zm00001d012069	8	167595011	167595111	+	20	CHH	0.0909091	2	6	0	4	2	9
Zm00001d012128	8	168570551	168570651	+	7	CHH	0.239264	5	33	0.18018	7	33	6
Zm00001d012128	8	168570651	168570751	+	8	CHH	0.0522876	7	23	0.04	4	23	1
Zm00001d012159	8	169174364	169174464	-	13	CHH	0.195122	3	31	0.13964	7	31	6
Zm00001d012159	8	169174264	169174364	-	14	CHH	0.0505051	7	29	0.031614	21	29	2
Zm00001d012159	8	169173864	169173964	-	18	CHH	0.0384615	23	27	0.0265604	28	27	1
Zm00001d012313	8	172257633	172257733	-	15	CHH	0.384615	3	10	0.231293	6	23	15
Zm00001d012313	8	172258633	172258733	-	5	CHH	0.0633803	20	28	0.0258449	18	28	4
Zm00001d012313	8	172258433	172258533	-	7	CHH	0.0552632	15	25	0.0275424	19	25	3
Zm00001d012313	8	172259033	172259133	-	1	CHH	0.0550847	16	30	0.037037	29	30	2
Zm00001d012313	8	172258533	172258633	-	6	CHH	0.0390244	20	21	0.0193548	15	21	2
Zm00001d012313	8	172258733	172258833	-	4	CHH	0.0617761	12	21	0.0404624	16	21	2
Zm00001d012313	8	172258333	172258433	-	8	CHH	0.0984127	11	28	0.0763359	19	28	2
Zm00001d012313	8	172258033	172258133	-	11	CHH	0.0522388	6	23	0.0416667	15	23	1
Zm00001d012338	8	172713950	172714050	-	4	CHH	0.0526316	2	9	0.0212766	6	16	3
Zm00001d012338	8	172714250	172714350	-	1	CHH	0.162907	15	26	0.142857	15	26	2
Zm00001d012381	8	173260362	173260462	-	16	CHH	0.342857	7	5	0.151515	4	25	19
Zm00001d012391	8	173423161	173423261	-	20	CHH	0.0178571	2	31	0	2	9	2
Zm00001d012591	8	176960112	176960212	-	1	CHH	0.357143	2	18	0.166667	2	18	19
Zm00001d012591	8	176959412	176959512	-	8	CHH	0.027027	2	31	0	2	31	3
Zm00001d012591	8	176959912	176960012	-	3	CHH	0.0163934	3	22	0	3	26	2
Zm00001d012591	8	176958312	176958412	-	19	CHH	0.0185185	2	27	0	2	27	2
Zm00001d012591	8	176958712	176958812	-	15	CHH	0.0107527	4	25	0	4	30	1
Zm00001d012591	8	176960012	176960112	-	2	CHH	0.385714	2	33	0.371429	4	34	1
Zm00001d012867	5	1369392	1369492	-	19	CHH	0.0175439	2	23	0	5	29	2
Zm00001d012867	5	1369892	1369992	-	14	CHH	0.0114943	4	22	0	6	22	1
Zm00001d012867	5	1369592	1369692	-	17	CHH	0.0126582	2	33	0	2	27	1
Zm00001d013281	5	7774701	7774801	-	9	CHH	0.0511811	7	35	0.0319767	10	35	2
Zm00001d013281	5	7774501	7774601	-	11	CHH	0.0222222	5	19	0	7	19	2
Zm00001d013281	5	7774601	7774701	-	10	CHH	0.0787879	6	26	0.0659898	8	26	1
Zm00001d013390	5	10264412	10264512	-	18	CHH	0.030303	2	20	0	5	28	3
Zm00001d013461	5	12113949	12114049	-	11	CHH	0.222222	2	29	0.185185	4	27	4
Zm00001d013494	5	12720609	12720709	-	2	CHH	0.12766	2	29	0	2	34	13
Zm00001d013494	5	12720309	12720409	-	5	CHH	0.0857143	4	30	0.0258621	4	30	6
Zm00001d013494	5	12718809	12718909	-	20	CHH	0.04	6	8	0	2	27	4
Zm00001d013494	5	12719009	12719109	-	18	CHH	0.0107527	4	26	0	2	26	1
Zm00001d013725	5	18631439	18631539	+	15	CHH	0.2	3	30	0.038674	6	30	16
Zm00001d013725	5	18631739	18631839	+	18	CHH	0.192488	7	32	0.107884	8	32	8
Zm00001d013725	5	18631639	18631739	+	17	CHH	0.295082	7	27	0.281853	10	27	1
Zm00001d014007	5	28476742	28476842	+	12	CHH	0.0175439	2	28	0	3	23	2
Zm00001d014007	5	28475642	28475742	+	1	CHH	0.0215827	6	25	0	2	25	2
Zm00001d014178	5	35072699	35072799	-	9	CHH	0.104167	3	18	0.030303	2	18	7
Zm00001d014178	5	35072199	35072299	-	14	CHH	0.0409836	4	33	0.0183486	3	33	2
Zm00001d014467	5	49118107	49118207	+	9	CHH	0.274882	9	24	0.157303	7	24	12
Zm00001d014467	5	49118407	49118507	+	12	CHH	0.133199	24	41	0.0572597	12	41	8
Zm00001d014467	5	49118007	49118107	+	8	CHH	0.374302	7	25	0.312102	6	25	6
Zm00001d014467	5	49118307	49118407	+	11	CHH	0.431438	12	26	0.368056	6	26	6
Zm00001d014467	5	49117907	49118007	+	7	CHH	0.224242	11	30	0.207469	8	30	2
Zm00001d014467	5	49118207	49118307	+	10	CHH	0.205298	11	28	0.182927	6	28	2
Zm00001d014467	5	49117407	49117507	+	2	CHH	0.0113636	3	30	0	2	28	1
Zm00001d014481	5	49725166	49725266	+	2	CHH	0.16	4	27	0.0303867	13	27	13
Zm00001d014481	5	49725066	49725166	+	1	CHH	0.0331126	7	22	0.0161616	23	22	2
Zm00001d014625	5	56333268	56333368	-	10	CHH	0.333333	3	2	0	3	2	33
Zm00001d014625	5	56333868	56333968	-	4	CHH	0.0789474	3	11	0.027027	2	24	5
Zm00001d014625	5	56333368	56333468	-	9	CHH	0.111111	4	5	0.08	2	11	3
Zm00001d014625	5	56332868	56332968	-	14	CHH	0.0227273	6	22	0	7	22	2
Zm00001d014744	5	61244620	61244720	-	6	CHH	0.0196078	7	21	0	5	21	2
Zm00001d015477	5	92667604	92667704	+	1	CHH	0.438596	4	15	0.109589	16	23	33
Zm00001d015477	5	92667704	92667804	+	2	CHH	0.269841	5	27	0.136808	11	27	13
Zm00001d015477	5	92667804	92667904	+	3	CHH	0.40404	6	18	0.325359	12	18	8
Zm00001d015477	5	92668004	92668104	+	5	CHH	0.0519187	15	29	0.0311284	18	29	2
Zm00001d015477	5	92667904	92668004	+	4	CHH	0.659574	11	13	0.645714	13	13	1
Zm00001d015977	5	136001945	136002045	-	1	CHH	0.0277778	3	13	0	5	27	3
Zm00001d015977	5	136001345	136001445	-	7	CHH	0.03125	3	10	0	2	26	3
Zm00001d015977	5	136001045	136001145	-	10	CHH	0.05	2	22	0.0294118	2	20	2
Zm00001d016160	5	147707933	147708033	+	18	CHH	0.0384615	2	13	0	2	11	4
Zm00001d016255	5	153719574	153719674	-	17	CHH	0.0140845	3	27	0	6	27	1
Zm00001d016662	5	171769490	171769590	-	19	CHH	0.296253	25	34	0.219156	18	34	8
Zm00001d016662	5	171769590	171769690	-	18	CHH	0.233209	21	26	0.205455	21	26	3
Zm00001d016662	5	171770290	171770390	-	11	CHH	0.075	3	13	0.0416667	3	18	3
Zm00001d016662	5	171769990	171770090	-	14	CHH	0.0722892	9	19	0.0534351	7	19	2
Zm00001d016982	5	181889104	181889204	-	2	CHH	0.631579	4	36	0.569444	2	36	6
Zm00001d016982	5	181887604	181887704	-	17	CHH	0.113636	3	16	0.0681818	2	26	5
Zm00001d016982	5	181889204	181889304	-	1	CHH	0.294118	4	23	0.247863	5	23	5
Zm00001d016982	5	181887304	181887404	-	20	CHH	0.0116279	4	24	0	3	24	1
Zm00001d017383	5	193951111	193951211	+	19	CHH	0.0222222	2	22	0	4	12	2
Zm00001d017453	5	196267424	196267524	+	12	CHH	0.0882353	2	18	0.0128205	7	24	8
Zm00001d017453	5	196267124	196267224	+	9	CHH	0.08	3	17	0.00945627	24	18	7
Zm00001d017453	5	196266324	196266424	+	1	CHH	0.037037	2	12	0	3	15	4
Zm00001d017453	5	196267224	196267324	+	10	CHH	0.0642202	4	28	0.0382244	29	28	3
Zm00001d017453	5	196266924	196267024	+	7	CHH	0.0526316	3	30	0.0192308	3	30	3
Zm00001d017762	5	206137667	206137767	+	17	CHH	0.0294118	3	21	0	2	25	3
Zm00001d017918	5	210086126	210086226	+	14	CHH	0.1875	3	16	0.0983607	5	13	9
Zm00001d017918	5	210085626	210085726	+	9	CHH	0.0827586	4	33	0.0445104	10	33	4
Zm00001d017918	5	210085426	210085526	+	7	CHH	0.0694444	6	24	0.027668	10	25	4
Zm00001d017918	5	210085126	210085226	+	4	CHH	0.0526316	4	13	0.00763359	8	33	4
Zm00001d017918	5	210085826	210085926	+	11	CHH	0.130719	6	25	0.107623	9	25	2
Zm00001d017968	5	211001496	211001596	-	12	CHH	0.65625	2	19	0.5	5	19	16
Zm00001d017989	5	211466113	211466213	-	11	CHH	0.25	2	8	0.0833333	2	21	17
Zm00001d018076	5	213818057	213818157	+	5	CHH	0.0166667	3	23	0	3	18	2
Zm00001d018076	5	213818657	213818757	+	11	CHH	0.0188679	5	22	0	6	22	2
Zm00001d018076	5	213819357	213819457	+	18	CHH	0.020202	11	9	0	6	24	2
Zm00001d018076	5	213818257	213818357	+	7	CHH	0.010101	9	11	0	5	25	1
Zm00001d018122	5	214719221	214719321	+	9	CHH	0.538462	2	14	0.356164	3	29	18
Zm00001d018122	5	214718621	214718721	+	3	CHH	0.230769	3	4	0.046729	4	24	18
Zm00001d018122	5	214718521	214718621	+	2	CHH	0.176471	9	10	0.0584192	9	33	12
Zm00001d018122	5	214718421	214718521	+	1	CHH	0.11215	6	18	0.0779221	12	20	3
Zm00001d018122	5	214720021	214720121	+	17	CHH	0.0103093	4	25	0	6	25	1
Zm00001d018178	5	215872642	215872742	-	10	CHH	0.468504	20	26	0.360927	12	26	11
Zm00001d018178	5	215873042	215873142	-	6	CHH	0.260163	4	28	0.221388	16	34	4
Zm00001d018178	5	215872842	215872942	-	8	CHH	0.224747	13	30	0.19685	17	30	3
Zm00001d018178	5	215873242	215873342	-	4	CHH	0.027933	7	25	0.0118577	10	25	2
Zm00001d018178	5	215872542	215872642	-	11	CHH	0.24	14	24	0.217391	11	24	2
Zm00001d018191	5	216115226	216115326	-	3	CHH	0.37931	10	33	0.301299	12	33	8
Zm00001d018191	5	216115326	216115426	-	2	CHH	0.209596	15	27	0.145191	20	27	6
Zm00001d018677	7	2377608	2377708	-	17	CHH	0.167539	8	25	0.0927835	5	20	7
Zm00001d018699	7	2730159	2730259	-	15	CHH	0.556818	3	32	0.195402	8	32	36
Zm00001d018699	7	2729959	2730059	-	17	CHH	0.447761	3	26	0.222222	10	26	23
Zm00001d018699	7	2730559	2730659	-	11	CHH	0.428571	2	3	0.258065	4	24	17
Zm00001d018699	7	2730059	2730159	-	16	CHH	0.214286	2	17	0.0982143	12	18	12
Zm00001d018699	7	2730259	2730359	-	14	CHH	0.0927152	8	20	0.0269058	11	20	7
Zm00001d018751	7	4198585	4198685	-	8	CHH	0.18018	3	33	0.057971	6	33	12
Zm00001d018751	7	4198885	4198985	-	5	CHH	0.088785	12	36	0.0733668	28	36	2
Zm00001d018751	7	4198785	4198885	-	6	CHH	0.158163	12	17	0.136784	32	17	2
Zm00001d018751	7	4198685	4198785	-	7	CHH	0.0992366	8	31	0.0858506	20	31	1
Zm00001d019446	7	34279674	34279774	-	13	CHH	0.1	2	5	0	3	11	10
Zm00001d019446	7	34279574	34279674	-	14	CHH	0.0344828	2	15	0	4	10	3
Zm00001d019446	7	34279474	34279574	-	15	CHH	0.0208333	3	15	0	2	15	2
Zm00001d020133	7	94844589	94844689	+	9	CHH	0.0196078	2	30	0.0075188	4	30	1
Zm00001d020332	7	107145237	107145337	+	16	CHH	0.0625	2	10	0.00590551	20	25	6
Zm00001d020332	7	107145337	107145437	+	17	CHH	0.313953	8	11	0.269896	26	11	4
Zm00001d020332	7	107145637	107145737	+	20	CHH	0.031746	4	17	0	4	26	3
Zm00001d020345	7	108131663	108131763	+	6	CHH	0.277778	2	8	0.0956522	6	20	18
Zm00001d020345	7	108132463	108132563	+	14	CHH	0.0769231	2	24	0	2	6	8
Zm00001d020348	7	108321204	108321304	+	8	CHH	0.415094	8	21	0.170103	9	21	24
Zm00001d020348	7	108320504	108320604	+	1	CHH	0.285714	3	5	0.166667	5	19	12
Zm00001d020348	7	108321104	108321204	+	7	CHH	0.169903	7	30	0.0860215	12	30	8
Zm00001d020348	7	108321404	108321504	+	10	CHH	0.375587	8	28	0.316109	12	28	6
Zm00001d020408	7	111957218	111957318	+	13	CHH	0.0634921	3	21	0.015444	10	25	5
Zm00001d020408	7	111957418	111957518	+	15	CHH	0.04	10	15	0.00934579	14	31	3
Zm00001d020457	7	115738389	115738489	+	10	CHH	0.0545455	2	27	0	2	18	5
Zm00001d020612	7	125096096	125096196	+	12	CHH	0.372549	4	13	0.266667	3	26	11
Zm00001d020612	7	125095596	125095696	+	7	CHH	0.027027	5	7	0	12	7	3
Zm00001d020620	7	125263551	125263651	-	13	CHH	0.155556	2	24	0.0377358	9	24	12
Zm00001d020620	7	125264551	125264651	-	3	CHH	0.368576	23	29	0.270096	21	29	10
Zm00001d020620	7	125263751	125263851	-	11	CHH	0.111111	3	10	0.00735294	10	27	10
Zm00001d020620	7	125263351	125263451	-	15	CHH	0.1	2	11	0.0301205	7	24	7
Zm00001d020620	7	125263251	125263351	-	16	CHH	0.0322581	3	11	0	8	12	3
Zm00001d020620	7	125264151	125264251	-	7	CHH	0.0575693	26	18	0.0373134	30	18	2
Zm00001d020620	7	125263451	125263551	-	14	CHH	0.0909091	3	10	0.0669145	9	29	2
Zm00001d020636	7	125835591	125835691	+	2	CHH	0.434783	2	12	0.213592	3	30	22
Zm00001d020636	7	125835491	125835591	+	1	CHH	0.264151	4	15	0.132653	4	28	13
Zm00001d020673	7	127590388	127590488	-	2	CHH	0.178571	2	13	0.0689655	6	21	11
Zm00001d020673	7	127590288	127590388	-	3	CHH	0.0465116	9	5	0.00900901	19	6	4
Zm00001d020673	7	127588588	127588688	-	20	CHH	0.0898483	20	42	0.0580357	11	42	3
Zm00001d020673	7	127589388	127589488	-	12	CHH	0.0241379	12	24	0.00905797	23	24	2
Zm00001d020673	7	127590188	127590288	-	4	CHH	0.025	5	16	0.0140845	5	28	1
Zm00001d020673	7	127589988	127590088	-	6	CHH	0.0210526	3	29	0.00952381	4	29	1
Zm00001d020673	7	127589488	127589588	-	11	CHH	0.0349206	9	37	0.0219922	21	37	1
Zm00001d020686	7	128316791	128316891	-	19	CHH	0.0119048	3	30	0	2	30	1
Zm00001d020686	7	128316991	128317091	-	17	CHH	0.0133333	2	38	0	4	17	1
Zm00001d020711	7	129695472	129695572	+	3	CHH	0.0512821	2	25	0.0222222	2	26	3
Zm00001d020811	7	133772992	133773092	+	10	CHH	0.176471	17	30	0.120347	27	30	6
Zm00001d020811	7	133773192	133773292	+	12	CHH	0.0782609	5	25	0.0148515	8	25	6
Zm00001d020811	7	133772792	133772892	+	8	CHH	0.0486111	16	27	0.0231696	40	27	3
Zm00001d020811	7	133773092	133773192	+	11	CHH	0.106164	13	22	0.075718	17	22	3
Zm00001d020811	7	133773992	133774092	+	20	CHH	0.015873	2	31	0	3	33	2
Zm00001d020828	7	134116666	134116766	-	3	CHH	0.0377358	2	24	0	4	24	4
Zm00001d020969	7	138202476	138202576	+	1	CHH	0.316602	9	28	0.191781	5	28	12
Zm00001d020969	7	138202576	138202676	+	2	CHH	0.0689655	4	24	0	2	19	7
Zm00001d020969	7	138202976	138203076	+	6	CHH	0.0153846	5	28	0	4	21	2
Zm00001d021059	7	141819345	141819445	+	15	CHH	0.250267	30	31	0.19571	36	31	5
Zm00001d021059	7	141819045	141819145	+	12	CHH	0.169935	6	25	0.137604	34	25	3
Zm00001d021059	7	141819245	141819345	+	14	CHH	0.155907	23	35	0.12316	37	35	3
Zm00001d021059	7	141819445	141819545	+	16	CHH	0.016129	30	25	0.00449944	36	25	1
Zm00001d021303	7	148338273	148338373	-	6	CHH	0.47076	18	19	0.330116	27	19	14
Zm00001d021303	7	148338373	148338473	-	5	CHH	0.154822	12	33	0.0964539	21	33	6
Zm00001d021303	7	148338173	148338273	-	7	CHH	0.347107	12	30	0.283203	17	30	6
Zm00001d021303	7	148338473	148338573	-	4	CHH	0.0298507	5	28	0	8	28	3
Zm00001d021573	7	156467280	156467380	-	17	CHH	0.12	2	15	0.0196078	17	21	10
Zm00001d021573	7	156468380	156468480	-	6	CHH	0.0126582	2	38	0	3	40	1
Zm00001d021573	7	156468880	156468980	-	1	CHH	0.0149254	3	21	0	3	21	1
Zm00001d021803	7	163278586	163278686	-	2	CHH	0.0599251	9	29	0.0314342	18	29	3
Zm00001d021803	7	163277986	163278086	-	8	CHH	0.0263158	3	15	0.0138889	3	27	1
Zm00001d021900	7	165630566	165630666	+	13	CHH	0.0222222	3	18	0	2	19	2
Zm00001d021978	7	167477784	167477884	+	8	CHH	0.2	2	6	0.0140845	6	12	19
Zm00001d021978	7	167478984	167479084	+	20	CHH	0.0144928	2	33	0	2	33	1
Zm00001d022211	7	172909269	172909369	+	10	CHH	0.016129	3	21	0	6	21	2
Zm00001d022342	7	175852237	175852337	-	3	CHH	0.110169	5	24	0.0582011	8	24	5
Zm00001d022349	7	175989953	175990053	+	9	CHH	0.230088	5	24	0.0383632	16	24	19
Zm00001d022349	7	175989853	175989953	+	8	CHH	0.0795455	11	23	0.0439189	26	23	4
Zm00001d022349	7	175989653	175989753	+	6	CHH	0.0729927	9	29	0.0290557	14	29	4
Zm00001d022376	7	176291482	176291582	-	15	CHH	0.29798	14	29	0.225	15	29	7
Zm00001d022376	7	176292282	176292382	-	7	CHH	0.0454545	2	10	0	2	10	5
Zm00001d022376	7	176292082	176292182	-	9	CHH	0.153061	7	27	0.0984456	7	27	5
Zm00001d022376	7	176291682	176291782	-	13	CHH	0.0871369	11	21	0.0583756	19	21	3
Zm00001d022376	7	176292182	176292282	-	8	CHH	0.0217391	3	27	0.00588235	6	27	2
Zm00001d022376	7	176291782	176291882	-	12	CHH	0.037037	9	20	0.0179641	17	20	2
Zm00001d022376	7	176291982	176292082	-	10	CHH	0.0655172	10	28	0.0519031	10	28	1
Zm00001d022524	7	179330431	179330531	+	3	CHH	0.119497	5	34	0.0494505	5	35	7
Zm00001d022524	7	179330331	179330431	+	2	CHH	0.0649351	10	37	0.0523256	9	37	1
Zm00001d023404	10	4838179	4838279	+	6	CHH	0.0454545	2	32	0	2	4	5
Zm00001d023404	10	4838479	4838579	+	9	CHH	0.0487805	2	19	0.0319149	4	24	2
Zm00001d023404	10	4838379	4838479	+	8	CHH	0.0333333	3	30	0.00980392	3	30	2
Zm00001d023522	10	8663276	8663376	-	14	CHH	0.221397	17	40	0.204578	17	40	2
Zm00001d023522	10	8663476	8663576	-	12	CHH	0.0285714	6	12	0.0176322	19	21	1
Zm00001d023529	10	8784017	8784117	-	2	CHH	0.22449	4	13	0.0425532	4	13	18
Zm00001d023529	10	8783917	8784017	-	3	CHH	0.226519	8	22	0.1125	7	22	11
Zm00001d023529	10	8783817	8783917	-	4	CHH	0.223938	10	25	0.153061	8	25	7
Zm00001d023529	10	8783517	8783617	-	7	CHH	0.043956	4	24	0.0243902	2	19	2
Zm00001d023529	10	8783717	8783817	-	5	CHH	0.150794	6	21	0.130719	7	21	2
Zm00001d023800	10	22058599	22058699	-	2	CHH	0.0625	2	10	0.0222222	3	17	4
Zm00001d023979	10	33927508	33927608	-	12	CHH	0.0613208	13	32	0.0216509	23	32	4
Zm00001d023979	10	33927008	33927108	-	17	CHH	0.0634006	20	34	0.0233236	30	34	4
Zm00001d023979	10	33927608	33927708	-	11	CHH	0.04	5	36	0.021419	21	36	2
Zm00001d023979	10	33927308	33927408	-	14	CHH	0.037234	21	36	0.015919	19	36	2
Zm00001d024572	10	78707796	78707896	-	2	CHH	0.11138	16	26	0.0836576	20	26	3
Zm00001d024572	10	78707696	78707796	-	3	CHH	0.0693642	13	26	0.0368421	22	26	3
Zm00001d024572	10	78707896	78707996	-	1	CHH	0.0723684	10	29	0.0623377	13	29	1
Zm00001d024778	10	87402344	87402444	-	12	CHH	0.223529	13	34	0.15665	30	34	7
Zm00001d024778	10	87402444	87402544	-	11	CHH	0.212121	9	29	0.163611	24	29	5
Zm00001d024778	10	87401644	87401744	-	19	CHH	0.0144928	2	28	0	2	20	1
Zm00001d025018	10	99916806	99916906	+	13	CHH	0.0479452	4	34	0.00952381	6	34	4
Zm00001d025018	10	99916506	99916606	+	10	CHH	0.0588235	2	22	0.028169	4	32	3
Zm00001d025018	10	99916406	99916506	+	9	CHH	0.0465116	3	31	0.0135135	3	26	3
Zm00001d025055	10	101884022	101884122	+	4	CHH	0.279279	6	19	0.17341	9	19	11
Zm00001d025055	10	101884922	101885022	+	13	CHH	0.0909091	2	6	0	2	19	9
Zm00001d025055	10	101883722	101883822	+	1	CHH	0.0487805	3	15	0	2	27	5
Zm00001d025055	10	101885622	101885722	+	20	CHH	0.0204082	2	32	0	3	32	2
Zm00001d025055	10	101884122	101884222	+	5	CHH	0.0519481	3	24	0.0390625	5	26	1
Zm00001d025055	10	101883822	101883922	+	2	CHH	0.0138889	3	26	0	4	26	1
Zm00001d025199	10	108608558	108608658	+	8	CHH	0.237288	2	32	0.0263158	2	25	21
Zm00001d025199	10	108608258	108608358	+	5	CHH	0.25	2	21	0.106383	4	24	14
Zm00001d025199	10	108609658	108609758	+	19	CHH	0.469925	30	18	0.343854	33	18	13
Zm00001d025199	10	108609558	108609658	+	18	CHH	0.339785	21	22	0.206954	27	22	13
Zm00001d025199	10	108608358	108608458	+	6	CHH	0.136752	4	29	0.0416667	2	29	10
Zm00001d025199	10	108607858	108607958	+	1	CHH	0.0368421	8	23	0	6	24	4
Zm00001d025199	10	108609258	108609358	+	15	CHH	0.0447427	17	27	0.0160858	14	27	3
Zm00001d025199	10	108609058	108609158	+	13	CHH	0.0540541	4	28	0.0348837	3	29	2
Zm00001d025199	10	108609458	108609558	+	17	CHH	0.207317	22	22	0.1875	20	22	2
Zm00001d025229	10	110198533	110198633	+	3	CHH	0.253968	3	20	0.043956	5	20	21
Zm00001d025229	10	110198833	110198933	+	6	CHH	0.243902	4	31	0.0963855	3	31	15
Zm00001d025229	10	110198933	110199033	+	7	CHH	0.0952381	3	20	0	2	20	10
Zm00001d025229	10	110199033	110199133	+	8	CHH	0.165854	7	29	0.120301	5	29	5
Zm00001d025229	10	110199133	110199233	+	9	CHH	0.0987654	4	23	0.0727273	5	23	3
Zm00001d025360	10	115527864	115527964	-	11	CHH	0.210526	2	17	0.0158103	15	17	19
Zm00001d025360	10	115528264	115528364	-	7	CHH	0.0930233	2	22	0.0377358	2	25	6
Zm00001d025360	10	115527764	115527864	-	12	CHH	0.372973	8	22	0.315934	17	22	6
Zm00001d025360	10	115527664	115527764	-	13	CHH	0.0613668	25	29	0.0278481	27	29	3
Zm00001d025580	10	122862342	122862442	-	7	CHH	0.151515	3	22	0.0588235	2	29	9
Zm00001d025580	10	122861142	122861242	-	19	CHH	0.0714286	4	4	0	2	25	7
Zm00001d025859	10	131635461	131635561	+	14	CHH	0.333333	2	6	0	2	5	33
Zm00001d025859	10	131634261	131634361	+	2	CHH	0.142857	2	7	0.0833333	3	23	6
Zm00001d025924	10	133842971	133843071	+	2	CHH	0.135135	2	23	0.0650888	7	24	7
Zm00001d025924	10	133842871	133842971	+	1	CHH	0.06	2	23	0.0421687	7	23	2
Zm00001d025924	10	133843171	133843271	+	4	CHH	0.0344828	10	28	0.0233463	9	28	1
Zm00001d025924	10	133843471	133843571	+	7	CHH	0.0140845	3	24	0	4	17	1
Zm00001d025964	10	134975502	134975602	+	7	CHH	0.189119	14	27	0.0939394	12	27	10
Zm00001d025964	10	134975702	134975802	+	9	CHH	0.169811	21	30	0.142857	22	30	3
Zm00001d025964	10	134975302	134975402	+	5	CHH	0.0412621	14	30	0.0251572	16	30	2
Zm00001d025964	10	134975602	134975702	+	8	CHH	0.289157	11	29	0.26817	14	29	2
Zm00001d025964	10	134975202	134975302	+	4	CHH	0.0822785	16	30	0.0593407	15	30	2
Zm00001d025964	10	134974902	134975002	+	1	CHH	0.0325098	21	36	0.00815661	17	36	2
Zm00001d026072	10	137693382	137693482	-	20	CHH	0.0119048	4	23	0	4	22	1
Zm00001d026126	10	139063028	139063128	+	17	CHH	0.272727	3	12	0	2	16	27
Zm00001d026126	10	139061928	139062028	+	6	CHH	0.142857	2	9	0	2	21	14
Zm00001d026126	10	139062128	139062228	+	8	CHH	0.047619	2	13	0.0075188	8	35	4
Zm00001d026126	10	139061428	139061528	+	1	CHH	0.09375	3	11	0.0727273	6	20	2
Zm00001d026131	10	139320351	139320451	+	15	CHH	0.0569823	39	32	0.0372915	32	32	2
Zm00001d026131	10	139319551	139319651	+	7	CHH	0.0136986	3	23	0	4	16	1
Zm00001d026370	10	144456035	144456135	-	4	CHH	0.0884956	4	28	0.0412979	12	28	5
Zm00001d026370	10	144454935	144455035	-	15	CHH	0.05	4	27	0.00757576	5	28	4
Zm00001d026414	10	145392800	145392900	+	3	CHH	0.333333	2	27	0.0954955	18	31	24
Zm00001d026414	10	145393800	145393900	+	13	CHH	0.25	2	7	0.111111	3	12	14
Zm00001d026414	10	145394000	145394100	+	15	CHH	0.172932	5	28	0.0618557	3	28	11
Zm00001d026414	10	145394100	145394200	+	16	CHH	0.0984848	4	33	0.0128205	3	26	9
Zm00001d026414	10	145393900	145394000	+	14	CHH	0.219048	5	22	0.195652	2	22	2
Zm00001d026447	10	145985181	145985281	-	8	CHH	0.1875	2	32	0.0967742	3	32	9
Zm00001d026447	10	145984981	145985081	-	10	CHH	0.0952381	4	16	0.0294118	5	28	7
Zm00001d026480	10	146720693	146720793	+	17	CHH	0.010989	4	26	0	2	33	1
Zm00001d026480	10	146719193	146719293	+	2	CHH	0.0114943	3	27	0	4	12	1
Zm00001d026635	10	149243973	149244073	+	5	CHH	0.0704225	2	35	0.0172414	3	35	5
Zm00001d026635	10	149245073	149245173	+	16	CHH	0.0625	2	21	0.025641	2	26	4
Zm00001d026635	10	149244973	149245073	+	15	CHH	0.0508475	3	20	0.00990099	5	20	4
Zm00001d026635	10	149244073	149244173	+	6	CHH	0.0437956	4	38	0	3	38	4
Zm00001d026635	10	149243573	149243673	+	1	CHH	0.0227273	2	23	0	2	17	2
Zm00001d026635	10	149244173	149244273	+	7	CHH	0.0143885	4	34	0	2	34	1
Zm00001d026670	10	149704378	149704478	-	20	CHH	0.0133333	4	19	0	2	26	1
Zm00001d027258	1	687655	687755	+	7	CHH	0.162791	2	25	0.0740741	3	26	9
Zm00001d027258	1	687455	687555	+	5	CHH	0.111111	2	15	0.0473684	5	35	6
Zm00001d027332	1	3095903	3096003	-	17	CHH	0.0131579	3	30	0	5	31	1
Zm00001d027341	1	3292305	3292405	-	8	CHH	0.0128205	3	31	0	2	15	1
Zm00001d027370	1	3848339	3848439	+	9	CHH	0.0166667	6	20	0	4	20	2
Zm00001d027520	1	7354608	7354708	+	4	CHH	0.142857	2	23	0.0208333	2	23	12
Zm00001d027520	1	7355408	7355508	+	12	CHH	0.25641	2	19	0.15625	2	18	10
Zm00001d027520	1	7356108	7356208	+	19	CHH	0.0113636	3	26	0	5	25	1
Zm00001d027593	1	8601210	8601310	-	4	CHH	0.0416667	4	38	0.0163934	5	38	3
Zm00001d027593	1	8601310	8601410	-	3	CHH	0.0428571	4	20	0.030303	8	20	1
Zm00001d027749	1	12552708	12552808	-	14	CHH	0.353357	11	25	0.245593	34	25	11
Zm00001d027749	1	12552808	12552908	-	13	CHH	0.0551724	6	23	0.0284738	38	23	3
Zm00001d027749	1	12553008	12553108	-	11	CHH	0.0838323	6	29	0.0553846	22	29	3
Zm00001d027749	1	12552908	12553008	-	12	CHH	0.0944882	6	22	0.0611961	33	22	3
Zm00001d027749	1	12552508	12552608	-	16	CHH	0.0508906	28	14	0.027907	31	14	2
Zm00001d027755	1	12675135	12675235	+	15	CHH	0.0916667	4	33	0.075	5	33	2
Zm00001d027755	1	12675635	12675735	+	20	CHH	0.012987	3	30	0	2	28	1
Zm00001d027894	1	16961804	16961904	-	16	CHH	0.047619	4	5	0	2	15	5
Zm00001d028120	1	23435797	23435897	-	7	CHH	0.257985	31	26	0.190355	30	26	7
Zm00001d028120	1	23435597	23435697	-	9	CHH	0.279683	34	22	0.253991	31	22	3
Zm00001d028120	1	23435997	23436097	-	5	CHH	0.0844063	23	31	0.0510563	18	31	3
Zm00001d028120	1	23435897	23435997	-	6	CHH	0.115653	35	29	0.0821256	29	29	3
Zm00001d028120	1	23436197	23436297	-	3	CHH	0.0393701	5	26	0.0274725	7	26	1
Zm00001d028692	1	43335455	43335555	-	14	CHH	0.0555556	2	9	0	3	10	6
Zm00001d028692	1	43336655	43336755	-	2	CHH	0.121413	19	24	0.057398	33	24	6
Zm00001d028692	1	43336455	43336555	-	4	CHH	0.0945652	35	26	0.0558451	52	26	4
Zm00001d028692	1	43336555	43336655	-	3	CHH	0.11303	23	28	0.0849492	39	28	3
Zm00001d028692	1	43336755	43336855	-	1	CHH	0.077957	12	32	0.0592105	19	32	2
Zm00001d028778	1	46191787	46191887	+	12	CHH	0.0204082	2	24	0	2	21	2
Zm00001d028809	1	47132844	47132944	-	6	CHH	0.0327869	2	34	0	2	13	3
Zm00001d029091	1	57495157	57495257	-	1	CHH	0.275	3	28	0.106383	3	29	17
Zm00001d029274	1	64513839	64513939	+	16	CHH	0.116279	2	21	0.101449	4	17	1
Zm00001d029366	1	67603392	67603492	+	5	CHH	0.130435	4	6	0	2	3	13
Zm00001d029366	1	67603992	67604092	+	11	CHH	0.222222	2	19	0.126984	5	14	10
Zm00001d029829	1	89156302	89156402	+	7	CHH	0.062201	6	37	0.0271186	8	37	4
Zm00001d029829	1	89155802	89155902	+	2	CHH	0.0319635	5	41	0	5	35	3
Zm00001d029829	1	89156402	89156502	+	8	CHH	0.043956	3	33	0.0247934	4	32	2
Zm00001d029835	1	89472822	89472922	+	5	CHH	0.182927	5	18	0.126761	3	24	6
Zm00001d029835	1	89474022	89474122	+	17	CHH	0.015873	2	26	0	6	26	2
Zm00001d029934	1	95218920	95219020	+	9	CHH	0.836735	3	16	0.627907	3	15	21
Zm00001d029934	1	95219020	95219120	+	10	CHH	0.454545	2	11	0.285714	4	12	17
Zm00001d029934	1	95219320	95219420	+	13	CHH	0.540541	2	15	0.480769	3	15	6
Zm00001d029934	1	95218820	95218920	+	8	CHH	0.0434783	4	22	0.0135135	4	21	3
Zm00001d029975	1	97117068	97117168	-	12	CHH	0.238095	2	26	0.12	4	28	12
Zm00001d029975	1	97118068	97118168	-	2	CHH	0.0615385	4	16	0.0363636	3	16	3
Zm00001d029988	1	97707521	97707621	-	7	CHH	0.153846	3	5	0.107143	6	5	5
Zm00001d029988	1	97707721	97707821	-	5	CHH	0.342541	8	22	0.30137	10	22	4
Zm00001d029988	1	97707821	97707921	-	4	CHH	0.27027	10	15	0.2375	11	15	3
Zm00001d030086	1	104419481	104419581	-	5	CHH	0.0961538	2	27	0.0699301	5	27	3
Zm00001d030343	1	123710873	123710973	-	4	CHH	0.102041	3	18	0	3	31	10
Zm00001d030343	1	123710973	123711073	-	3	CHH	0.107143	2	15	0.0208333	2	21	9
Zm00001d030343	1	123710773	123710873	-	5	CHH	0.0697674	4	10	0.0123457	3	29	6
Zm00001d030343	1	123710673	123710773	-	6	CHH	0.05	5	13	0.0243902	2	27	3
Zm00001d030851	1	163242789	163242889	-	3	CHH	0.0857143	3	25	0.0487805	2	38	4
Zm00001d031203	1	181980631	181980731	-	13	CHH	0.411765	2	10	0.162162	2	18	25
Zm00001d031203	1	181980231	181980331	-	17	CHH	0.241379	2	14	0.0769231	3	13	16
Zm00001d031203	1	181981831	181981931	-	1	CHH	0.0125	3	28	0	6	28	1
Zm00001d031267	1	184396669	184396769	+	12	CHH	0.109091	3	17	0.0425532	9	20	7
Zm00001d031267	1	184396169	184396269	+	7	CHH	0.0569106	5	24	0.0314465	13	24	3
Zm00001d031267	1	184395669	184395769	+	2	CHH	0.0389344	11	44	0.0198915	13	44	2
Zm00001d031267	1	184396369	184396469	+	9	CHH	0.0384615	2	11	0.017094	17	27	2
Zm00001d031290	1	185336475	185336575	-	1	CHH	0.015625	7	19	0	4	19	2
Zm00001d031290	1	185336075	185336175	-	5	CHH	0.0121951	3	28	0	3	18	1
Zm00001d031555	1	194123061	194123161	-	15	CHH	0.016129	2	25	0	3	21	2
Zm00001d031555	1	194123861	194123961	-	7	CHH	0.0105263	3	33	0	2	33	1
Zm00001d031749	1	200691459	200691559	-	4	CHH	0.030303	5	13	0	3	32	3
Zm00001d031790	1	201946260	201946360	+	10	CHH	0.358871	20	25	0.347507	27	25	1
Zm00001d031790	1	201947060	201947160	+	18	CHH	0.0123457	3	28	0	3	25	1
Zm00001d031807	1	202455320	202455420	+	11	CHH	0.0576923	2	24	0	3	24	6
Zm00001d031848	1	203992461	203992561	-	12	CHH	0.0344828	2	36	0.0118694	9	36	2
Zm00001d032069	1	211227816	211227916	+	1	CHH	0.169492	6	30	0.0979381	6	30	7
Zm00001d032116	1	213645429	213645529	-	15	CHH	0.568528	5	36	0.334842	6	36	23
Zm00001d032116	1	213645829	213645929	-	11	CHH	0.166667	2	9	0.12	7	24	5
Zm00001d032116	1	213645229	213645329	-	17	CHH	0.224806	6	22	0.171598	14	25	5
Zm00001d032116	1	213644929	213645029	-	20	CHH	0.154982	8	32	0.118227	6	32	4
Zm00001d032116	1	213645329	213645429	-	16	CHH	0.281879	4	39	0.259947	10	39	2
Zm00001d032138	1	214253731	214253831	+	18	CHH	0.0155039	5	25	0	5	29	2
Zm00001d032138	1	214252331	214252431	+	4	CHH	0.029703	3	40	0.00699301	3	41	2
Zm00001d032144	1	214381272	214381372	-	13	CHH	0.134146	4	21	0	5	21	13
Zm00001d032144	1	214381372	214381472	-	12	CHH	0.153846	3	18	0.0490196	3	32	10
Zm00001d032144	1	214381172	214381272	-	14	CHH	0.0490196	5	22	0	4	22	5
Zm00001d032144	1	214382472	214382572	-	1	CHH	0.0574713	3	30	0.0147059	2	30	4
Zm00001d032144	1	214381972	214382072	-	6	CHH	0.03125	3	11	0	2	11	3
Zm00001d032144	1	214381472	214381572	-	11	CHH	0.1	2	9	0.0877193	2	23	1
Zm00001d032461	1	227447915	227448015	+	7	CHH	0.0454545	3	14	0.0135135	2	32	3
Zm00001d032461	1	227448415	227448515	+	12	CHH	0.0747331	11	26	0.0642202	21	26	1
Zm00001d032461	1	227449215	227449315	+	20	CHH	0.0266667	3	24	0.0136986	3	23	1
Zm00001d032461	1	227448515	227448615	+	13	CHH	0.0842912	9	29	0.0713073	20	29	1
Zm00001d032610	1	232017908	232018008	-	14	CHH	0.190361	13	33	0.0818386	27	33	11
Zm00001d032610	1	232017708	232017808	-	16	CHH	0.102564	2	25	0.0126582	8	20	9
Zm00001d032610	1	232018008	232018108	-	13	CHH	0.0867347	8	25	0.0225873	19	25	6
Zm00001d032610	1	232017808	232017908	-	15	CHH	0.0794702	6	25	0.0290179	18	25	5
Zm00001d032610	1	232018108	232018208	-	12	CHH	0.109375	7	18	0.0727273	10	23	4
Zm00001d033369	1	260632924	260633024	+	13	CHH	0.0555556	2	11	0	4	10	6
Zm00001d033369	1	260632524	260632624	+	9	CHH	0.037037	2	15	0	2	15	4
Zm00001d033369	1	260631924	260632024	+	3	CHH	0.0153846	2	29	0	2	11	2
Zm00001d033447	1	262990283	262990383	+	5	CHH	0.0793651	3	22	0.0131579	3	23	7
Zm00001d033447	1	262991383	262991483	+	16	CHH	0.118644	3	22	0.0566038	14	26	6
Zm00001d033447	1	262991483	262991583	+	17	CHH	0.0571429	2	21	0.00917431	5	21	5
Zm00001d033447	1	262991283	262991383	+	15	CHH	0.153409	7	27	0.117175	23	27	4
Zm00001d033447	1	262991083	262991183	+	13	CHH	0.0886076	3	26	0.0439189	11	26	4
Zm00001d033447	1	262991183	262991283	+	14	CHH	0.0641711	7	25	0.0480769	21	25	2
Zm00001d033447	1	262990383	262990483	+	6	CHH	0.0909091	2	21	0.078125	3	23	1
Zm00001d033447	1	262990083	262990183	+	3	CHH	0.0142857	3	23	0	3	25	1
Zm00001d033931	1	278825162	278825262	-	18	CHH	0.0454545	2	12	0	2	13	5
Zm00001d033931	1	278826262	278826362	-	7	CHH	0.0384615	3	20	0	3	24	4
Zm00001d033943	1	279335118	279335218	+	9	CHH	0.125	2	5	0	2	22	13
Zm00001d033943	1	279334818	279334918	+	6	CHH	0.0107527	5	18	0	4	18	1
Zm00001d034027	1	281461178	281461278	-	18	CHH	0.171271	14	25	0.133705	14	25	4
Zm00001d034027	1	281461278	281461378	-	17	CHH	0.22488	12	18	0.187013	21	18	4
Zm00001d034558	1	296305237	296305337	-	20	CHH	0.0117647	3	34	0	4	16	1
Zm00001d034651	1	298854908	298855008	+	12	CHH	0.0625	3	25	0.0205479	25	29	4
Zm00001d034651	1	298854708	298854808	+	10	CHH	0.0909091	2	18	0.0470085	11	22	4
Zm00001d034651	1	298855108	298855208	+	14	CHH	0.0570571	9	37	0.0375204	17	37	2
Zm00001d034651	1	298855208	298855308	+	15	CHH	0.046875	4	29	0.0240385	7	30	2
Zm00001d034651	1	298854508	298854608	+	8	CHH	0.0461538	7	36	0.0350877	10	36	1
Zm00001d035000	6	1390982	1391082	-	19	CHH	0.0123457	4	23	0	2	21	1
Zm00001d035000	6	1392382	1392482	-	5	CHH	0.0125	3	28	0	6	28	1
Zm00001d035079	6	4025422	4025522	-	6	CHH	0.269231	2	13	0.171875	3	25	10
Zm00001d035079	6	4025322	4025422	-	7	CHH	0.0645161	4	16	0.0145985	5	27	5
Zm00001d035079	6	4024722	4024822	-	13	CHH	0.0175439	2	27	0	2	23	2
Zm00001d035134	6	6610209	6610309	-	4	CHH	0.217391	2	25	0	2	27	22
Zm00001d035134	6	6610109	6610209	-	5	CHH	0.0925926	2	30	0.0133333	3	30	8
Zm00001d035134	6	6610009	6610109	-	6	CHH	0.117647	3	18	0.0333333	6	14	8
Zm00001d035134	6	6609509	6609609	-	11	CHH	0.056338	5	31	0	2	25	6
Zm00001d035166	6	7478007	7478107	+	10	CHH	0.176991	6	19	0.0282486	6	32	15
Zm00001d035166	6	7477907	7478007	+	9	CHH	0.0454545	2	21	0	3	22	5
Zm00001d035494	6	29423616	29423716	-	2	CHH	0.179487	2	20	0.0596026	8	20	12
Zm00001d035494	6	29422916	29423016	-	9	CHH	0.0842105	6	31	0.0332103	17	31	5
Zm00001d035505	6	29706447	29706547	+	4	CHH	0.191489	3	15	0.02	4	24	17
Zm00001d035505	6	29707647	29707747	+	16	CHH	0.0608696	4	29	0	9	29	6
Zm00001d036280	6	81597203	81597303	+	12	CHH	0.172414	2	26	0.04	5	33	13
Zm00001d036280	6	81597303	81597403	+	13	CHH	0.0851064	2	29	0.0185185	3	35	7
Zm00001d036499	6	90646170	90646270	-	1	CHH	0.0769231	2	17	0	2	26	8
Zm00001d036533	6	91322481	91322581	+	5	CHH	0.380952	7	12	0.31405	10	12	7
Zm00001d036533	6	91323781	91323881	+	18	CHH	0.381818	8	29	0.319328	4	29	6
Zm00001d036533	6	91323881	91323981	+	19	CHH	0.287356	3	30	0.234375	2	30	5
Zm00001d036533	6	91323581	91323681	+	16	CHH	0.0185185	2	26	0	2	11	2
Zm00001d036533	6	91323081	91323181	+	11	CHH	0.0953488	16	27	0.0736994	26	27	2
Zm00001d036533	6	91323681	91323781	+	17	CHH	0.0691358	10	39	0.0472973	4	39	2
Zm00001d036533	6	91322581	91322681	+	6	CHH	0.269663	5	17	0.256983	9	21	1
Zm00001d036637	6	95869075	95869175	-	1	CHH	0.0277778	2	24	0	2	24	3
Zm00001d036637	6	95867375	95867475	-	18	CHH	0.0119048	4	24	0	4	26	1
Zm00001d036683	6	97505166	97505266	+	14	CHH	0.47	12	17	0.295181	17	19	17
Zm00001d036683	6	97505266	97505366	+	15	CHH	0.0321101	22	10	0.0136986	9	32	2
Zm00001d036683	6	97505066	97505166	+	13	CHH	0.261468	11	20	0.240506	16	20	2
Zm00001d036683	6	97504966	97505066	+	12	CHH	0.210682	16	21	0.186691	26	21	2
Zm00001d036683	6	97504166	97504266	+	4	CHH	0.0102041	7	14	0	4	20	1
Zm00001d036683	6	97503866	97503966	+	1	CHH	0.0104167	4	24	0	2	20	1
Zm00001d036700	6	98079778	98079878	-	3	CHH	0.0232558	4	11	0	3	20	2
Zm00001d037057	6	110843720	110843820	+	7	CHH	0.1	2	15	0.047619	2	32	5
Zm00001d037724	6	135238218	135238318	+	2	CHH	0.037037	2	11	0.0211268	12	12	2
Zm00001d037730	6	135520110	135520210	-	5	CHH	0.0909091	3	23	0	3	21	9
Zm00001d037730	6	135520410	135520510	-	2	CHH	0.175	7	34	0.0804598	5	33	9
Zm00001d037730	6	135520310	135520410	-	3	CHH	0.132353	13	31	0.0569106	8	31	8
Zm00001d037730	6	135519410	135519510	-	12	CHH	0.584906	2	28	0.5	10	5	8
Zm00001d037730	6	135519910	135520010	-	7	CHH	0.0797101	5	26	0.03125	2	19	5
Zm00001d037730	6	135519810	135519910	-	8	CHH	0.0590909	8	27	0.0188679	2	27	4
Zm00001d037730	6	135520510	135520610	-	1	CHH	0.10101	3	31	0.0851064	2	26	2
Zm00001d037730	6	135519310	135519410	-	13	CHH	0.0232558	2	20	0	5	8	2
Zm00001d037768	6	136798964	136799064	-	17	CHH	0.224719	3	32	0.0785714	4	35	15
Zm00001d037768	6	136800464	136800564	-	2	CHH	0.0910494	16	40	0.0405827	24	40	5
Zm00001d037768	6	136798864	136798964	-	18	CHH	0.26158	10	37	0.222222	10	37	4
Zm00001d037769	6	136800795	136800895	+	3	CHH	0.0625	5	18	0.00900901	4	25	5
Zm00001d037769	6	136802195	136802295	+	17	CHH	0.0107527	4	23	0	4	23	1
Zm00001d037894	6	141325548	141325648	-	20	CHH	0.0181818	3	18	0	15	5	2
Zm00001d037911	6	141752324	141752424	+	16	CHH	0.0277778	2	16	0	2	23	3
Zm00001d038146	6	149356799	149356899	-	14	CHH	0.386792	3	35	0.12963	2	27	26
Zm00001d038146	6	149358099	149358199	-	1	CHH	0.34	2	21	0.135714	6	23	20
Zm00001d038146	6	149357999	149358099	-	2	CHH	0.166667	2	4	0.0411765	7	26	13
Zm00001d038146	6	149357699	149357799	-	5	CHH	0.123288	2	30	0.0666667	4	26	6
Zm00001d038146	6	149356999	149357099	-	12	CHH	0.0285714	2	22	0	2	22	3
Zm00001d038304	6	154056156	154056256	-	19	CHH	0.015748	4	29	0	6	29	2
Zm00001d038730	6	163427275	163427375	-	17	CHH	0.119403	2	29	0	2	30	12
Zm00001d038730	6	163427375	163427475	-	16	CHH	0.0606061	2	40	0.0430108	2	40	2
Zm00001d038753	6	163899297	163899397	-	9	CHH	0.422727	6	34	0.206186	11	34	22
Zm00001d038753	6	163899397	163899497	-	8	CHH	0.272727	19	17	0.175589	27	17	10
Zm00001d038753	6	163899497	163899597	-	7	CHH	0.0454545	18	28	0.0292165	27	28	2
Zm00001d038753	6	163898597	163898697	-	16	CHH	0.0163934	3	24	0	2	28	2
Zm00001d038753	6	163898397	163898497	-	18	CHH	0.0107527	2	38	0	6	11	1
Zm00001d038753	6	163899597	163899697	-	6	CHH	0.0246914	7	24	0.011583	10	26	1
Zm00001d038846	6	165735690	165735790	-	5	CHH	0.255814	2	19	0.121951	2	26	13
Zm00001d038846	6	165735490	165735590	-	7	CHH	0.030303	2	21	0	3	24	3
Zm00001d038846	6	165735590	165735690	-	6	CHH	0.025641	2	25	0.00869565	4	32	2
Zm00001d038846	6	165734790	165734890	-	14	CHH	0.0232558	2	23	0	3	19	2
Zm00001d038846	6	165734690	165734790	-	15	CHH	0.0240964	3	25	0	5	25	2
Zm00001d038860	6	165999742	165999842	-	8	CHH	0.47482	4	37	0.283237	5	37	19
Zm00001d038860	6	165999942	166000042	-	6	CHH	0.117647	2	29	0.0873786	3	32	3
Zm00001d038911	6	166851323	166851423	+	19	CHH	0.0196078	9	6	0	4	14	2
Zm00001d038913	6	166867432	166867532	+	12	CHH	0.134904	13	35	0.0776699	18	35	6
Zm00001d038913	6	166867332	166867432	+	11	CHH	0.112045	13	28	0.0780347	12	28	3
Zm00001d038913	6	166866632	166866732	+	4	CHH	0.0175439	2	29	0	2	15	2
Zm00001d038913	6	166867132	166867232	+	9	CHH	0.0660981	15	31	0.0435967	12	31	2
Zm00001d039065	6	169490084	169490184	+	10	CHH	0.0181818	2	36	0	2	19	2
Zm00001d039148	6	171049231	171049331	+	15	CHH	0.0238095	2	19	0	2	15	2
Zm00001d039919	3	19360496	19360596	-	9	CHH	0.14	3	19	0.0280374	3	32	11
Zm00001d039919	3	19360396	19360496	-	10	CHH	0.0625	6	23	0.0046729	9	23	6
Zm00001d039919	3	19360196	19360296	-	12	CHH	0.142857	2	28	0.105882	3	26	4
Zm00001d039919	3	19359596	19359696	-	18	CHH	0.028169	4	16	0	2	31	3
Zm00001d039975	3	21327653	21327753	-	18	CHH	0.536723	5	36	0.373016	4	36	16
Zm00001d039975	3	21328353	21328453	-	11	CHH	0.12894	9	40	0.0754352	13	40	5
Zm00001d039975	3	21328153	21328253	-	13	CHH	0.0763636	11	24	0.0606936	14	24	2
Zm00001d039975	3	21328053	21328153	-	14	CHH	0.0446429	6	20	0.0257732	19	20	2
Zm00001d039975	3	21328453	21328553	-	10	CHH	0.0733945	4	27	0.0629921	9	28	1
Zm00001d040056	3	25351907	25352007	+	8	CHH	0.0714286	3	18	0.0204082	2	26	5
Zm00001d040056	3	25351807	25351907	+	7	CHH	0.0121951	3	32	0	4	12	1
Zm00001d040056	3	25353007	25353107	+	19	CHH	0.0142857	6	12	0	8	17	1
Zm00001d040190	3	31514459	31514559	-	6	CHH	0.0631579	3	30	0.0257937	17	30	4
Zm00001d040190	3	31514359	31514459	-	7	CHH	0.0505618	6	31	0.0351852	17	31	2
Zm00001d040190	3	31513559	31513659	-	15	CHH	0.227273	3	28	0.215152	10	32	1
Zm00001d040190	3	31514659	31514759	-	4	CHH	0.0232558	2	25	0.00864553	12	30	1
Zm00001d040567	3	50459958	50460058	+	19	CHH	0.22093	5	18	0.0736842	5	18	15
Zm00001d040567	3	50459858	50459958	+	18	CHH	0.190476	5	25	0.0904977	9	25	10
Zm00001d040567	3	50459758	50459858	+	17	CHH	0.11236	3	26	0.027027	11	26	9
Zm00001d040567	3	50459658	50459758	+	16	CHH	0.0393701	5	24	0.0241379	12	24	2
Zm00001d040567	3	50459358	50459458	+	13	CHH	0.0171429	7	26	0	5	26	2
Zm00001d040567	3	50459558	50459658	+	15	CHH	0.0566802	8	30	0.0392157	10	30	2
Zm00001d040567	3	50460058	50460158	+	20	CHH	0.0461538	3	23	0.025641	2	23	2
Zm00001d040567	3	50459458	50459558	+	14	CHH	0.0410256	10	41	0.01875	8	41	2
Zm00001d040627	3	54951503	54951603	-	12	CHH	0.0779221	2	32	0	3	37	8
Zm00001d040807	3	67158662	67158762	-	11	CHH	0.5	2	2	0	3	29	50
Zm00001d040807	3	67158262	67158362	-	15	CHH	0.2125	5	15	0.0600522	26	15	15
Zm00001d040807	3	67158562	67158662	-	12	CHH	0.0657895	6	38	0.028169	9	38	4
Zm00001d040807	3	67158362	67158462	-	14	CHH	0.035865	16	29	0.0256082	27	29	1
Zm00001d041191	3	104336745	104336845	+	16	CHH	0.363636	4	27	0	2	15	36
Zm00001d041191	3	104336445	104336545	+	13	CHH	0.0625	2	28	0.0119048	4	23	5
Zm00001d041191	3	104337045	104337145	+	19	CHH	0.0175439	2	32	0	2	30	2
Zm00001d041191	3	104336245	104336345	+	11	CHH	0.0526316	3	15	0.0283019	5	20	2
Zm00001d041656	3	132169440	132169540	-	13	CHH	0.0759494	3	26	0.0416667	6	26	3
Zm00001d041656	3	132169340	132169440	-	14	CHH	0.0208333	5	37	0.00465116	6	37	2
Zm00001d041656	3	132169240	132169340	-	15	CHH	0.0243902	4	35	0	5	35	2
Zm00001d042013	3	147398291	147398391	+	4	CHH	0.076087	3	27	0.010989	3	29	7
Zm00001d042013	3	147398391	147398491	+	5	CHH	0.118812	3	35	0.0535714	2	27	7
Zm00001d042013	3	147398191	147398291	+	3	CHH	0.04	3	26	0.0125	3	26	3
Zm00001d042148	3	153594840	153594940	-	10	CHH	0.0227273	2	22	0	5	22	2
Zm00001d042274	3	158535565	158535665	-	7	CHH	0.0972222	5	27	0.0449438	7	27	5
Zm00001d042274	3	158535665	158535765	-	6	CHH	0.0857143	4	44	0.0427136	9	44	4
Zm00001d042274	3	158535965	158536065	-	3	CHH	0.037464	12	29	0.00817439	13	29	3
Zm00001d042274	3	158535765	158535865	-	5	CHH	0.054902	7	37	0.0376884	11	37	2
Zm00001d042279	3	158643767	158643867	+	3	CHH	0.195652	2	25	0.0285714	2	23	17
Zm00001d042279	3	158643667	158643767	+	2	CHH	0.0862069	2	29	0.0172414	2	25	7
Zm00001d042721	3	178186199	178186299	+	17	CHH	0.308333	4	33	0.115789	3	33	19
Zm00001d042721	3	178184999	178185099	+	5	CHH	0.427419	4	28	0.287037	12	28	14
Zm00001d042721	3	178184699	178184799	+	2	CHH	0.140306	12	33	0.0619308	17	33	8
Zm00001d042721	3	178184799	178184899	+	3	CHH	0.0968858	11	27	0.0574713	13	27	4
Zm00001d042826	3	181232224	181232324	-	20	CHH	0.0125	3	24	0	4	25	1
Zm00001d042862	3	182289983	182290083	+	13	CHH	0.162791	3	17	0.116279	2	26	5
Zm00001d042862	3	182289083	182289183	+	4	CHH	0.0606061	4	25	0.00735294	6	21	5
Zm00001d042862	3	182288883	182288983	+	2	CHH	0.0180033	20	30	0.00675676	20	30	1
Zm00001d042886	3	182903247	182903347	-	4	CHH	0.5	2	25	0.434599	18	27	7
Zm00001d042886	3	182902347	182902447	-	13	CHH	0.016129	3	19	0	2	22	2
Zm00001d042886	3	182901747	182901847	-	19	CHH	0.0130719	19	8	0	5	21	1
Zm00001d042898	3	183230325	183230425	+	3	CHH	0.181818	2	5	0.025641	2	19	16
Zm00001d042898	3	183230225	183230325	+	2	CHH	0.142857	5	8	0.0357143	2	24	11
Zm00001d042898	3	183231225	183231325	+	12	CHH	0.147541	2	25	0.0375	7	12	11
Zm00001d042898	3	183231125	183231225	+	11	CHH	0.111888	5	27	0.0470588	6	27	6
Zm00001d042898	3	183231025	183231125	+	10	CHH	0.0505415	9	31	0.0264151	9	31	2
Zm00001d042898	3	183230825	183230925	+	8	CHH	0.0263158	3	25	0.015625	3	25	1
Zm00001d042932	3	184468111	184468211	+	16	CHH	0.076524	34	23	0.0614439	28	23	2
Zm00001d042932	3	184467511	184467611	+	10	CHH	0.0105263	2	39	0	2	17	1
Zm00001d042932	3	184468211	184468311	+	17	CHH	0.65035	27	21	0.637081	24	21	1
Zm00001d042940	3	184602548	184602648	-	18	CHH	0.0128205	3	28	0	3	16	1
Zm00001d043117	3	189692230	189692330	+	12	CHH	0.428571	2	15	0.203125	2	41	23
Zm00001d043180	3	190786846	190786946	-	5	CHH	0.309859	3	27	0.0738786	14	27	24
Zm00001d043180	3	190786646	190786746	-	7	CHH	0.351351	6	20	0.220238	8	20	13
Zm00001d043180	3	190785846	190785946	-	15	CHH	0.0454545	2	14	0	2	11	5
Zm00001d043180	3	190786546	190786646	-	8	CHH	0.105882	3	26	0.0846561	7	26	2
Zm00001d043180	3	190787146	190787246	-	2	CHH	0.0392157	2	21	0.0247934	11	23	1
Zm00001d043205	3	191580847	191580947	-	20	CHH	0.0169492	2	24	0	2	31	2
Zm00001d043263	3	193695079	193695179	+	10	CHH	0.0384615	2	14	0	2	16	4
Zm00001d043536	3	203124066	203124166	+	4	CHH	0.529412	3	27	0.287037	5	21	24
Zm00001d043536	3	203124966	203125066	+	13	CHH	0.0816327	2	24	0.0108696	7	14	7
Zm00001d043536	3	203124766	203124866	+	11	CHH	0.181818	11	8	0.147959	8	25	3
Zm00001d043549	3	203551345	203551445	+	20	CHH	0.05	4	5	0	2	31	5
Zm00001d043549	3	203551245	203551345	+	19	CHH	0.0147059	3	21	0	5	21	1
Zm00001d043596	3	204661018	204661118	-	8	CHH	0.0769231	3	34	0.036036	5	22	4
Zm00001d043596	3	204660918	204661018	-	9	CHH	0.0984848	4	30	0.0574713	4	22	4
Zm00001d043596	3	204660718	204660818	-	11	CHH	0.0337838	4	33	0.0121951	2	33	2
Zm00001d043596	3	204661118	204661218	-	7	CHH	0.0227273	2	22	0	3	22	2
Zm00001d043601	3	204890475	204890575	-	20	CHH	0.0232558	2	21	0	4	17	2
Zm00001d043612	3	205151830	205151930	+	13	CHH	0.0540541	2	23	0.0322581	2	32	2
Zm00001d043614	3	205240483	205240583	+	14	CHH	0.280899	6	30	0.173387	8	30	11
Zm00001d043614	3	205240383	205240483	+	13	CHH	0.314685	8	18	0.279279	6	18	4
Zm00001d043614	3	205239283	205239383	+	2	CHH	0.0361446	3	31	0	3	31	4
Zm00001d043614	3	205239183	205239283	+	1	CHH	0.0307692	2	38	0	2	33	3
Zm00001d043730	3	208599984	208600084	-	12	CHH	0.0506329	2	38	0.0108108	5	38	4
Zm00001d043730	3	208600084	208600184	-	11	CHH	0.0483871	2	28	0.0230769	5	28	3
Zm00001d043733	3	208649607	208649707	+	7	CHH	0.1	2	33	0.0078125	8	34	9
Zm00001d043733	3	208649907	208650007	+	10	CHH	0.0898204	5	37	0.032	7	37	6
Zm00001d043733	3	208649707	208649807	+	8	CHH	0.0684932	3	25	0.031746	7	27	4
Zm00001d043733	3	208650007	208650107	+	11	CHH	0.0480769	5	22	0.0111111	5	34	4
Zm00001d043733	3	208649507	208649607	+	6	CHH	0.0505051	4	25	0.00591716	6	27	4
Zm00001d043992	3	215848506	215848606	+	1	CHH	0.145833	2	25	0.0128205	3	25	13
Zm00001d043992	3	215850306	215850406	+	19	CHH	0.0361446	15	27	0.00990099	11	27	3
Zm00001d043992	3	215849006	215849106	+	6	CHH	0.155556	3	14	0.136364	6	12	2
Zm00001d044045	3	217678250	217678350	+	10	CHH	0.05	2	29	0.00966184	6	35	4
Zm00001d044078	3	218442780	218442880	+	5	CHH	0.233333	2	19	0.0461538	3	25	19
Zm00001d044078	3	218442880	218442980	+	6	CHH	0.102564	2	23	0	3	23	10
Zm00001d044078	3	218443180	218443280	+	9	CHH	0.0606061	2	14	0.0208333	4	23	4
Zm00001d044078	3	218443380	218443480	+	11	CHH	0.3125	2	8	0.277778	2	16	3
Zm00001d044093	3	218978400	218978500	+	11	CHH	0.0752688	3	29	0	2	34	8
Zm00001d044093	3	218978300	218978400	+	10	CHH	0.0470588	4	24	0	3	24	5
Zm00001d044109	3	219504279	219504379	+	7	CHH	0.0833333	6	29	0.0625	9	29	2
Zm00001d044109	3	219504079	219504179	+	5	CHH	0.0269058	10	22	0.0166667	11	22	1
Zm00001d044109	3	219503879	219503979	+	3	CHH	0.0391645	12	33	0.0246479	9	33	1
Zm00001d044120	3	219824944	219825044	-	11	CHH	0.192308	2	32	0.118874	30	32	7
Zm00001d044124	3	219884820	219884920	-	14	CHH	0.118557	13	15	0.0393443	20	15	8
Zm00001d044124	3	219884720	219884820	-	15	CHH	0.076	27	28	0.0395913	28	28	4
Zm00001d044124	3	219885620	219885720	-	6	CHH	0.0535714	4	30	0.010101	3	30	4
Zm00001d044124	3	219884520	219884620	-	17	CHH	0.0730769	15	17	0.0480769	6	17	3
Zm00001d044124	3	219885320	219885420	-	9	CHH	0.0645161	2	27	0.0454545	5	29	2
Zm00001d044124	3	219886120	219886220	-	1	CHH	0.0689655	2	29	0.0584795	6	30	1
Zm00001d044124	3	219884920	219885020	-	13	CHH	0.0144928	3	22	0	8	24	1
Zm00001d044142	3	220334812	220334912	+	11	CHH	0.445026	16	24	0.315508	23	24	13
Zm00001d044142	3	220334712	220334812	+	10	CHH	0.185547	23	22	0.114341	23	22	7
Zm00001d044142	3	220334512	220334612	+	8	CHH	0.0565476	14	24	0.0157068	16	24	4
Zm00001d044142	3	220334912	220335012	+	12	CHH	0.563776	15	27	0.534118	16	27	3
Zm00001d044142	3	220335012	220335112	+	13	CHH	0.185484	13	19	0.15311	11	19	3
Zm00001d044142	3	220335512	220335612	+	18	CHH	0.0192308	2	23	0	4	5	2
Zm00001d044142	3	220335112	220335212	+	14	CHH	0.02	6	25	0	6	25	2
Zm00001d044142	3	220334412	220334512	+	7	CHH	0.0226244	8	27	0.0122951	9	27	1
Zm00001d044159	3	220746689	220746789	+	6	CHH	0.0952381	4	36	0.0344828	4	36	6
Zm00001d044159	3	220747489	220747589	+	14	CHH	0.119403	3	25	0.0764331	5	30	4
Zm00001d044159	3	220747289	220747389	+	12	CHH	0.0464135	6	38	0.0216216	7	25	2
Zm00001d044864	9	5826780	5826880	+	13	CHH	0.131148	3	19	0.0875421	9	32	4
Zm00001d044864	9	5827480	5827580	+	20	CHH	0.013986	4	34	0	3	35	1
Zm00001d045204	9	15997443	15997543	-	12	CHH	0.0306122	3	32	0.0075188	4	32	2
Zm00001d045204	9	15997143	15997243	-	15	CHH	0.0106383	5	20	0	3	20	1
Zm00001d045988	9	52805171	52805271	-	1	CHH	0.153846	3	29	0.0336134	4	29	12
Zm00001d045988	9	52804471	52804571	-	8	CHH	0.026087	5	23	0.00980392	4	23	2
Zm00001d045988	9	52805071	52805171	-	2	CHH	0.0288462	5	42	0.012	6	42	2
Zm00001d045988	9	52804971	52805071	-	3	CHH	0.0343137	7	30	0.0157068	6	30	2
Zm00001d046073	9	61596960	61597060	+	19	CHH	0.172414	3	35	0.150943	3	35	2
Zm00001d046210	9	72062449	72062549	+	13	CHH	0.19403	2	27	0.0887372	11	27	11
Zm00001d046210	9	72062549	72062649	+	14	CHH	0.174419	3	32	0.0632911	12	41	11
Zm00001d046210	9	72062249	72062349	+	11	CHH	0.0833333	2	19	0.0430108	4	22	4
Zm00001d046210	9	72061349	72061449	+	2	CHH	0.0392157	3	34	0.0206186	3	34	2
Zm00001d046210	9	72061449	72061549	+	3	CHH	0.0490196	3	32	0.025641	3	36	2
Zm00001d046210	9	72061949	72062049	+	8	CHH	0.0243902	2	27	0.0125	6	14	1
Zm00001d046281	9	77964933	77965033	+	20	CHH	0.025641	2	18	0	4	23	3
Zm00001d046593	9	97674181	97674281	+	17	CHH	0.0133333	9	8	0	3	27	1
Zm00001d046593	9	97674481	97674581	+	20	CHH	0.0144928	3	23	0	2	14	1
Zm00001d046632	9	99813717	99813817	+	8	CHH	0.366906	3	42	0.216216	5	42	15
Zm00001d046632	9	99814917	99815017	+	20	CHH	0.0178571	2	32	0	3	32	2
Zm00001d046632	9	99813817	99813917	+	9	CHH	0.0454545	2	27	0.0227273	3	27	2
Zm00001d046632	9	99813517	99813617	+	6	CHH	0.0102041	3	30	0	4	30	1
Zm00001d046644	9	100187814	100187914	+	11	CHH	0.576923	9	20	0.411444	18	20	17
Zm00001d046644	9	100187714	100187814	+	10	CHH	0.153846	3	27	0.0448179	12	31	11
Zm00001d046644	9	100188214	100188314	+	15	CHH	0.0238095	5	17	0	5	6	2
Zm00001d046644	9	100188514	100188614	+	18	CHH	0.0119048	7	23	0	4	23	1
Zm00001d046644	9	100188614	100188714	+	19	CHH	0.013245	6	26	0	4	25	1
Zm00001d047060	9	116940704	116940804	-	15	CHH	0.05	3	8	0	2	6	5
Zm00001d047060	9	116940504	116940604	-	17	CHH	0.0142857	3	24	0	2	23	1
Zm00001d047259	9	124558701	124558801	-	2	CHH	0.392857	9	22	0.304462	17	22	9
Zm00001d047259	9	124558801	124558901	-	1	CHH	0.179949	13	29	0.110749	21	29	7
Zm00001d047259	9	124556901	124557001	-	20	CHH	0.0114943	6	29	0	4	29	1
Zm00001d047260	9	124558747	124558847	+	14	CHH	0.247104	11	24	0.163223	20	24	8
Zm00001d047260	9	124558647	124558747	+	13	CHH	0.336957	9	21	0.27933	17	21	6
Zm00001d047261	9	124759995	124760095	+	12	CHH	0.302326	2	18	0.0363636	2	24	27
Zm00001d047261	9	124759795	124759895	+	10	CHH	0.0625	2	21	0	2	19	6
Zm00001d047261	9	124760795	124760895	+	20	CHH	0.011236	3	29	0	2	29	1
Zm00001d047261	9	124760095	124760195	+	13	CHH	0.0555556	2	11	0.0441176	2	28	1
Zm00001d047290	9	125662466	125662566	+	12	CHH	0.20339	2	32	0	3	32	20
Zm00001d047290	9	125662666	125662766	+	14	CHH	0.238095	2	31	0.0839695	4	31	15
Zm00001d047290	9	125662566	125662666	+	13	CHH	0.0465116	3	29	0.0350877	4	30	1
Zm00001d047547	9	134959444	134959544	+	15	CHH	0.0285714	4	27	0.00816326	18	27	2
Zm00001d047547	9	134959544	134959644	+	16	CHH	0.0227273	8	34	0.010514	25	34	1
Zm00001d047547	9	134959744	134959844	+	18	CHH	0.1	10	21	0.0851064	13	21	1
Zm00001d047553	9	135126129	135126229	+	18	CHH	0.522727	6	22	0.342105	21	22	18
Zm00001d047765	9	141342855	141342955	+	9	CHH	0.209302	5	24	0.185	8	24	2
Zm00001d047765	9	141343955	141344055	+	20	CHH	0.0138249	8	26	0.0035461	11	26	1
Zm00001d047981	9	147121446	147121546	-	8	CHH	0.0191617	29	29	0.00672269	21	29	1
Zm00001d047994	9	147442728	147442828	+	6	CHH	0.458015	5	25	0.299363	6	25	16
Zm00001d047994	9	147442528	147442628	+	4	CHH	0.222222	5	21	0.0578512	6	21	16
Zm00001d047994	9	147443428	147443528	+	13	CHH	0.0185185	2	33	0	4	14	2
Zm00001d047994	9	147442328	147442428	+	2	CHH	0.0289855	2	30	0.0142857	5	30	1
Zm00001d047995	9	147603376	147603476	+	4	CHH	0.0454545	2	11	0.030303	2	20	2
Zm00001d047995	9	147603676	147603776	+	7	CHH	0.0108696	7	14	0	2	22	1
Zm00001d048142	9	150757177	150757277	-	5	CHH	0.0163934	4	15	0	2	27	2
Zm00001d048142	9	150757477	150757577	-	2	CHH	0.0105263	2	39	0	5	10	1
Zm00001d048185	9	151986003	151986103	+	14	CHH	0.030303	2	16	0	3	22	3
Zm00001d048185	9	151985003	151985103	+	4	CHH	0.020202	4	25	0.00483092	8	25	2
Zm00001d048201	9	152367465	152367565	+	3	CHH	0.139241	4	19	0.0263158	2	22	11
Zm00001d048201	9	152367365	152367465	+	2	CHH	0.0939597	5	33	0	2	33	9
Zm00001d048220	9	152672326	152672426	+	15	CHH	0.396226	3	16	0.228188	16	19	17
Zm00001d048220	9	152671026	152671126	+	2	CHH	0.0833333	2	32	0	3	27	8
Zm00001d048220	9	152670926	152671026	+	1	CHH	0.0784314	3	31	0.0444444	2	27	3
Zm00001d048220	9	152672426	152672526	+	16	CHH	0.264706	18	25	0.249682	31	25	2
Zm00001d048220	9	152671926	152672026	+	11	CHH	0.0229885	4	20	0.00382409	26	20	2
Zm00001d048220	9	152671126	152671226	+	3	CHH	0.01	3	36	0	3	31	1
Zm00001d048621	4	1519171	1519271	+	14	CHH	0.103448	3	18	0.0298507	3	40	7
Zm00001d048621	4	1519371	1519471	+	16	CHH	0.0512821	2	21	0	2	27	5
Zm00001d048621	4	1519471	1519571	+	17	CHH	0.0294118	2	16	0	2	26	3
Zm00001d048680	4	3204708	3204808	-	16	CHH	0.0285714	4	17	0	12	22	3
Zm00001d048680	4	3204608	3204708	-	17	CHH	0.0239521	6	26	0.00183823	21	26	2
Zm00001d048694	4	3418243	3418343	-	13	CHH	0.226087	3	37	0.15103	12	37	8
Zm00001d048694	4	3418943	3419043	-	6	CHH	0.0454545	2	29	0.028169	3	24	2
Zm00001d048962	4	10902641	10902741	-	16	CHH	0.0983607	4	34	0.0441176	8	34	5
Zm00001d048962	4	10902741	10902841	-	15	CHH	0.0405405	3	23	0	4	35	4
Zm00001d048962	4	10902341	10902441	-	19	CHH	0.0120482	6	14	0	5	28	1
Zm00001d049049	4	13893727	13893827	-	11	CHH	0.242424	3	13	0.145161	4	17	10
Zm00001d049049	4	13894027	13894127	-	8	CHH	0.16	3	9	0.0793651	4	17	8
Zm00001d049049	4	13894127	13894227	-	7	CHH	0.1	3	16	0.0454545	2	35	5
Zm00001d049049	4	13893327	13893427	-	15	CHH	0.0285714	3	12	0	2	30	3
Zm00001d049049	4	13893527	13893627	-	13	CHH	0.111111	2	17	0.100719	6	23	1
Zm00001d049049	4	13893827	13893927	-	10	CHH	0.0530973	3	36	0.038835	3	35	1
Zm00001d049218	4	21164246	21164346	+	7	CHH	0.0666667	6	28	0.00636943	5	29	6
Zm00001d049218	4	21164046	21164146	+	5	CHH	0.0584416	8	19	0.030303	7	19	3
Zm00001d049218	4	21164546	21164646	+	10	CHH	0.0721649	4	25	0.0410959	3	25	3
Zm00001d049218	4	21164146	21164246	+	6	CHH	0.0662983	7	25	0.0496454	6	25	2
Zm00001d049218	4	21163946	21164046	+	4	CHH	0.0204082	6	32	0.0103093	3	30	1
Zm00001d049640	4	38546052	38546152	+	4	CHH	0.0621118	9	34	0.0315399	16	34	3
Zm00001d049870	4	49703959	49704059	-	18	CHH	0.0377358	4	14	0	5	13	4
Zm00001d049870	4	49703859	49703959	-	19	CHH	0.0277778	5	8	0	3	8	3
Zm00001d049870	4	49704959	49705059	-	8	CHH	0.0394737	4	21	0.0294118	5	21	1
Zm00001d049926	4	53432330	53432430	-	10	CHH	0.0925926	4	29	0.0188679	27	29	7
Zm00001d049926	4	53432230	53432330	-	11	CHH	0.031746	2	28	0.00598802	30	28	3
Zm00001d049987	4	57415572	57415672	+	15	CHH	0.0263158	2	22	0	2	11	3
Zm00001d050055	4	62773090	62773190	-	5	CHH	0.213592	13	23	0.187032	17	23	3
Zm00001d050055	4	62771690	62771790	-	19	CHH	0.0210526	4	27	0.004329	9	27	2
Zm00001d050055	4	62772990	62773090	-	6	CHH	0.0864865	10	38	0.0716216	19	38	1
Zm00001d050308	4	80305568	80305668	+	12	CHH	0.0833333	5	23	0.0283019	5	23	6
Zm00001d050308	4	80305268	80305368	+	9	CHH	0.078125	5	28	0.0232558	2	21	5
Zm00001d050308	4	80305168	80305268	+	8	CHH	0.0322581	3	10	0	2	23	3
Zm00001d050308	4	80305768	80305868	+	14	CHH	0.0545455	2	23	0.0384615	2	24	2
Zm00001d050308	4	80304468	80304568	+	1	CHH	0.0232558	2	27	0	2	29	2
Zm00001d050323	4	81388871	81388971	+	12	CHH	0.233333	2	17	0.0510949	6	24	18
Zm00001d050323	4	81388671	81388771	+	10	CHH	0.0714286	2	9	0.037037	2	12	3
Zm00001d050339	4	82300032	82300132	+	20	CHH	0.0322581	4	7	0.0135135	3	23	2
Zm00001d050339	4	82298132	82298232	+	1	CHH	0.0111111	2	37	0	2	14	1
Zm00001d051048	4	138675269	138675369	-	11	CHH	0.0408163	2	22	0.0111111	3	27	3
Zm00001d051313	4	153189949	153190049	+	12	CHH	0.300699	4	34	0.216667	16	34	8
Zm00001d051313	4	153189149	153189249	+	4	CHH	0.0408163	2	28	0.010101	3	31	3
Zm00001d051415	4	157602147	157602247	+	1	CHH	0.08	2	15	0.0229008	5	28	6
Zm00001d051415	4	157603247	157603347	+	12	CHH	0.0487805	2	22	0.0301624	15	29	2
Zm00001d051415	4	157602247	157602347	+	2	CHH	0.05	4	28	0.0266344	15	28	2
Zm00001d051424	4	158066000	158066100	-	17	CHH	0.0175439	2	25	0	3	13	2
Zm00001d051596	4	164055981	164056081	+	4	CHH	0.382353	2	18	0.0776471	21	20	30
Zm00001d051596	4	164056181	164056281	+	6	CHH	0.307692	2	29	0.166134	11	29	14
Zm00001d051596	4	164057381	164057481	+	18	CHH	0.0285714	5	7	0	2	17	3
Zm00001d051908	4	174321023	174321123	-	16	CHH	0.214286	2	18	0.0714286	2	8	14
Zm00001d051908	4	174321523	174321623	-	11	CHH	0.119107	15	27	0.044843	25	27	7
Zm00001d051908	4	174320923	174321023	-	17	CHH	0.0564516	4	33	0.0151515	2	27	4
Zm00001d051908	4	174321323	174321423	-	13	CHH	0.0277778	2	17	0	4	32	3
Zm00001d051938	4	174857617	174857717	-	11	CHH	0.109091	6	27	0.018018	4	27	9
Zm00001d051938	4	174857417	174857517	-	13	CHH	0.139535	16	22	0.0855263	7	22	5
Zm00001d051938	4	174858317	174858417	-	4	CHH	0.0116279	4	24	0	7	24	1
Zm00001d052064	4	178264485	178264585	-	2	CHH	0.212121	2	41	0	2	24	21
Zm00001d052064	4	178264385	178264485	-	3	CHH	0.0238095	2	19	0	2	27	2
Zm00001d052147	4	181054350	181054450	-	17	CHH	0.0192308	2	30	0	2	18	2
Zm00001d052268	4	185311532	185311632	-	5	CHH	0.0769231	2	34	0.0434783	3	27	3
Zm00001d052458	4	190416122	190416222	-	14	CHH	0.380952	2	12	0.210526	2	22	17
Zm00001d052903	4	204205238	204205338	+	16	CHH	0.153846	2	13	0	2	11	15
Zm00001d052903	4	204204338	204204438	+	7	CHH	0.0185185	3	19	0	3	13	2
Zm00001d053195	4	219202351	219202451	+	10	CHH	0.638298	4	13	0.303922	8	13	33
Zm00001d053195	4	219202451	219202551	+	11	CHH	0.0434783	3	14	0	5	19	4
Zm00001d053195	4	219201951	219202051	+	6	CHH	0.0571429	2	16	0.0406504	7	17	2
Zm00001d053195	4	219202751	219202851	+	14	CHH	0.0238095	2	24	0	2	12	2

## Sheet: groupII_DEGs_CHH_increase
FileS8.2: SeqCap promoter methylation ratios for Mop1 ABA abd Mop1 MS in the CHH context. The promoter region was defined as 2 kb upstream of the TSS. Promoter bins start at 20 (0 Kb from TSS) and end at 0 (2 Kb from TSS).
gene_id	chr	start	stop	strand	promoter_bin	methylation_context	ratio_Mop1_ABA	coverage_Mop1_ABA	sites_Mop1_ABA	ratio_Mop1_MS	coverage_Mop1_MS	sites_Mop1_MS	%_meth_diff(Mop1_ABA-Mop1_MS)*100
Zm00001d000222	B73V4_ctg26	142385	142485	+	3	CHH	0.0153846	8	34	0	7	29	2
Zm00001d000222	B73V4_ctg26	143585	143685	+	15	CHH	0.0455927	27	24	0.0264317	28	24	2
Zm00001d000222	B73V4_ctg26	143985	144085	+	19	CHH	0.425197	19	27	0.377604	14	27	5
Zm00001d000222	B73V4_ctg26	143885	143985	+	18	CHH	0.282392	18	17	0.185668	18	17	10
Zm00001d000222	B73V4_ctg26	143785	143885	+	17	CHH	0.346835	13	31	0.220564	19	31	13
Zm00001d002514	2	14448384	14448484	-	9	CHH	0.0511464	14	41	0.0383562	27	41	1
Zm00001d002514	2	14448484	14448584	-	8	CHH	0.0458333	7	35	0.029304	16	35	2
Zm00001d002989	2	28935602	28935702	-	20	CHH	0.0119048	2	37	0	2	37	1
Zm00001d003058	2	30711153	30711253	-	20	CHH	0.04	2	14	0	2	14	4
Zm00001d003085	2	31710956	31711056	-	8	CHH	0.0121951	3	31	0	2	18	1
Zm00001d003118	2	32786749	32786849	+	15	CHH	0.516393	8	31	0.413636	14	31	10
Zm00001d003118	2	32785949	32786049	+	7	CHH	0.15	2	11	0	4	11	15
Zm00001d003118	2	32786049	32786149	+	8	CHH	0.153846	2	8	0	3	8	15
Zm00001d003142	2	33459202	33459302	-	7	CHH	0.0359712	5	29	0.025641	11	29	1
Zm00001d003488	2	45755735	45755835	+	13	CHH	0.0414201	17	29	0.0296912	29	29	1
Zm00001d003488	2	45755235	45755335	+	8	CHH	0.0222222	2	25	0.00860215	16	29	1
Zm00001d003488	2	45755535	45755635	+	11	CHH	0.0471464	12	34	0.0300842	24	34	2
Zm00001d003488	2	45755335	45755435	+	9	CHH	0.0307692	4	32	0.0120664	21	32	2
Zm00001d003488	2	45756035	45756135	+	16	CHH	0.0909091	2	23	0	7	23	9
Zm00001d003504	2	46190890	46190990	-	8	CHH	0.157895	2	18	0.0423729	5	23	12
Zm00001d003504	2	46191090	46191190	-	6	CHH	0.553571	2	34	0.154762	2	34	40
Zm00001d003504	2	46190990	46191090	-	7	CHH	0.514706	2	31	0.113043	4	29	40
Zm00001d003663	2	53136582	53136682	+	7	CHH	0.0833333	4	29	0.0497925	8	29	3
Zm00001d003663	2	53137682	53137782	+	18	CHH	0.138889	2	16	0.0833333	7	20	6
Zm00001d003676	2	53787714	53787814	+	17	CHH	0.0746269	2	32	0.0415648	13	32	3
Zm00001d003676	2	53786514	53786614	+	5	CHH	0.142857	3	29	0.0619835	8	29	8
Zm00001d003676	2	53787614	53787714	+	16	CHH	0.12766	2	25	0.0236686	12	28	10
Zm00001d003676	2	53786414	53786514	+	4	CHH	0.220339	2	25	0.0860215	4	23	13
Zm00001d003676	2	53786614	53786714	+	6	CHH	0.166667	3	6	0.03125	5	24	14
Zm00001d003676	2	53786314	53786414	+	3	CHH	0.226415	2	30	0	2	22	23
Zm00001d003797	2	59723651	59723751	-	19	CHH	0.0106383	4	24	0	2	17	1
Zm00001d003797	2	59724151	59724251	-	14	CHH	0.107143	6	15	0.0958904	3	21	1
Zm00001d003797	2	59723851	59723951	-	17	CHH	0.08	3	10	0	2	17	8
Zm00001d003797	2	59724251	59724351	-	13	CHH	0.109756	9	35	0.0244755	8	35	9
Zm00001d003848	2	62253755	62253855	+	1	CHH	0.212963	12	26	0.187234	18	26	3
Zm00001d003848	2	62253855	62253955	+	2	CHH	0.205479	4	19	0.0960452	7	24	11
Zm00001d003848	2	62253955	62254055	+	3	CHH	0.133333	2	7	0.0212766	3	18	11
Zm00001d004309	2	102232078	102232178	+	10	CHH	0.015873	4	30	0	3	18	2
Zm00001d004309	2	102231778	102231878	+	7	CHH	0.0352941	3	30	0	3	32	4
Zm00001d004309	2	102231678	102231778	+	6	CHH	0.0444444	2	23	0	3	25	4
Zm00001d004309	2	102232378	102232478	+	13	CHH	0.046729	3	41	0	6	41	5
Zm00001d004439	2	112052056	112052156	-	2	CHH	0.101695	4	33	0.0220994	5	33	8
Zm00001d004480	2	114518052	114518152	-	13	CHH	0.0243902	2	27	0.00892857	4	27	2
Zm00001d004626	2	122680185	122680285	-	10	CHH	0.0328947	4	35	0	3	35	3
Zm00001d005174	2	162404244	162404344	-	7	CHH	0.0652174	3	31	0.0366492	6	32	3
Zm00001d005174	2	162404744	162404844	-	2	CHH	0.05	2	11	0.0147059	2	30	4
Zm00001d005879	2	191550720	191550820	-	3	CHH	0.0555556	3	20	0.04	3	16	2
Zm00001d005879	2	191549820	191549920	-	12	CHH	0.195329	18	26	0.164905	18	26	3
Zm00001d005879	2	191550020	191550120	-	10	CHH	0.353414	20	25	0.289855	22	25	6
Zm00001d005879	2	191549920	191550020	-	11	CHH	0.187688	24	28	0.120846	24	28	7
Zm00001d005879	2	191550120	191550220	-	9	CHH	0.420792	19	21	0.350365	26	21	7
Zm00001d006064	2	197102386	197102486	+	7	CHH	0.0243902	3	12	0	2	12	2
Zm00001d006064	2	197102286	197102386	+	6	CHH	0.027027	2	21	0	2	11	3
Zm00001d006064	2	197102886	197102986	+	12	CHH	0.0487805	2	17	0	2	17	5
Zm00001d006282	2	203488896	203488996	+	17	CHH	0.0232558	2	28	0	5	30	2
Zm00001d006282	2	203487296	203487396	+	1	CHH	0.0322581	2	14	0	3	19	3
Zm00001d006285	2	203554552	203554652	-	19	CHH	0.0192308	2	27	0	4	11	2
Zm00001d006285	2	203555752	203555852	-	7	CHH	0.037037	3	34	0	2	34	4
Zm00001d006285	2	203555452	203555552	-	10	CHH	0.076087	3	27	0.0245902	4	32	5
Zm00001d006446	2	208459692	208459792	-	10	CHH	0.025641	2	33	0	4	33	3
Zm00001d006446	2	208460492	208460592	-	2	CHH	0.20614	8	30	0.171875	9	30	3
Zm00001d006511	2	210208083	210208183	-	17	CHH	0.0952381	3	7	0.0727273	5	12	2
Zm00001d006511	2	210208183	210208283	-	16	CHH	0.333333	2	2	0.0357143	4	20	30
Zm00001d006511	2	210208883	210208983	-	9	CHH	0.666667	2	2	0.231579	5	20	44
Zm00001d006704	2	214782664	214782764	+	5	CHH	0.0373832	3	32	0.0154639	6	34	2
Zm00001d006704	2	214783564	214783664	+	14	CHH	0.234848	4	32	0.212928	8	32	2
Zm00001d006704	2	214782564	214782664	+	4	CHH	0.0595238	3	25	0.0322581	7	25	3
Zm00001d006704	2	214782764	214782864	+	6	CHH	0.0357143	2	16	0	3	29	4
Zm00001d006704	2	214783964	214784064	+	18	CHH	0.0555556	3	28	0.0152672	5	28	4
Zm00001d006704	2	214783864	214783964	+	17	CHH	0.289474	8	14	0.241667	9	28	5
Zm00001d006704	2	214783664	214783764	+	15	CHH	0.24	5	19	0.17341	9	19	7
Zm00001d006704	2	214783764	214783864	+	16	CHH	0.336	7	19	0.243243	12	19	9
Zm00001d006704	2	214783464	214783564	+	13	CHH	0.3125	2	25	0.141361	8	25	17
Zm00001d006879	2	218403836	218403936	-	18	CHH	0.0123457	3	30	0	2	32	1
Zm00001d006879	2	218403636	218403736	-	20	CHH	0.0172414	2	32	0	2	25	2
Zm00001d008209	8	1242965	1243065	-	13	CHH	0.0377358	2	27	0.0175439	2	34	2
Zm00001d008209	8	1242865	1242965	-	14	CHH	0.0882353	2	29	0	2	31	9
Zm00001d009373	8	60722268	60722368	+	6	CHH	0.0392157	9	24	0.0263158	6	24	1
Zm00001d009373	8	60722368	60722468	+	7	CHH	0.0675676	8	37	0.0273224	10	37	4
Zm00001d010422	8	114409264	114409364	-	7	CHH	0.0263158	2	23	0	2	21	3
Zm00001d010422	8	114409764	114409864	-	2	CHH	0.0350877	3	22	0	2	21	4
Zm00001d010422	8	114408864	114408964	-	11	CHH	0.05	2	13	0	2	14	5
Zm00001d010422	8	114408564	114408664	-	14	CHH	0.232143	3	19	0.0461538	3	26	19
Zm00001d010422	8	114408464	114408564	-	15	CHH	0.393939	2	20	0.207547	2	25	19
Zm00001d010459	8	116262201	116262301	+	2	CHH	0.125628	9	23	0.0797546	35	23	5
Zm00001d011451	8	150858888	150858988	+	6	CHH	0.01	4	26	0	2	13	1
Zm00001d011451	8	150859788	150859888	+	15	CHH	0.481481	2	16	0.388889	2	8	9
Zm00001d011451	8	150859888	150859988	+	16	CHH	0.173913	3	9	0	4	3	17
Zm00001d011757	8	160826984	160827084	+	19	CHH	0.0196078	2	25	0	2	22	2
Zm00001d011878	8	163835643	163835743	+	4	CHH	0.270492	6	20	0.206107	7	20	6
Zm00001d011878	8	163835743	163835843	+	5	CHH	0.276596	2	21	0.177215	7	23	10
Zm00001d011921	8	164600480	164600580	+	2	CHH	0.0322581	2	16	0	2	16	3
Zm00001d012019	8	166618917	166619017	+	3	CHH	0.0384615	2	15	0	2	34	4
Zm00001d012274	8	171716675	171716775	+	4	CHH	0.0277778	2	20	0.00985222	8	24	2
Zm00001d012274	8	171717075	171717175	+	8	CHH	0.0263158	2	19	0	2	17	3
Zm00001d012274	8	171716775	171716875	+	5	CHH	0.0392157	2	28	0.0125786	5	31	3
Zm00001d012707	8	179031729	179031829	+	17	CHH	0.0930233	3	16	0.047619	3	32	5
Zm00001d012707	8	179031829	179031929	+	18	CHH	0.0918367	5	21	0.0431034	3	38	5
Zm00001d012707	8	179031529	179031629	+	15	CHH	0.222222	2	8	0	3	29	22
Zm00001d012719	8	179168468	179168568	-	17	CHH	0.025	2	23	0	4	14	3
Zm00001d014820	5	64548753	64548853	-	6	CHH	0.0674157	4	25	0.0538462	5	28	1
Zm00001d014820	5	64549053	64549153	-	3	CHH	0.0455635	16	26	0.0319149	14	26	1
Zm00001d014820	5	64549153	64549253	-	2	CHH	0.0628272	12	33	0.0263158	10	33	4
Zm00001d014820	5	64549253	64549353	-	1	CHH	0.0893617	9	26	0.0451128	10	26	4
Zm00001d014820	5	64548653	64548753	-	7	CHH	0.0608696	6	38	0.00779221	10	38	5
Zm00001d014820	5	64548853	64548953	-	5	CHH	0.136364	3	29	0.0601504	4	32	8
Zm00001d014918	5	68351081	68351181	+	9	CHH	0.0769231	2	17	0	2	14	8
Zm00001d014971	5	70583019	70583119	-	3	CHH	0.0434783	2	30	0.021978	6	30	2
Zm00001d014971	5	70583219	70583319	-	1	CHH	0.0930233	2	19	0.025641	2	17	7
Zm00001d015569	5	98413267	98413367	-	12	CHH	0.015625	6	11	0	3	11	2
Zm00001d015715	5	111121548	111121648	+	8	CHH	0.153846	2	7	0.00680272	7	21	15
Zm00001d015715	5	111120948	111121048	+	2	CHH	0.181818	2	7	0	2	27	18
Zm00001d015715	5	111121648	111121748	+	9	CHH	0.24359	2	33	0.061008	11	33	18
Zm00001d015744	5	115568060	115568160	+	15	CHH	0.0384615	2	26	0.0175439	4	31	2
Zm00001d015744	5	115567860	115567960	+	13	CHH	0.6	2	6	0.338462	4	16	26
Zm00001d016031	5	140468939	140469039	+	18	CHH	0.0625	2	8	0	2	26	6
Zm00001d016036	5	140781640	140781740	-	1	CHH	0.0512821	4	21	0.019802	3	38	3
Zm00001d016154	5	147359996	147360096	-	7	CHH	0.0135135	4	21	0	3	12	1
Zm00001d016154	5	147360396	147360496	-	3	CHH	0.0217391	2	28	0	2	25	2
Zm00001d016408	5	161311644	161311744	+	12	CHH	0.100917	4	30	0.0291262	6	36	7
Zm00001d016435	5	162237998	162238098	+	18	CHH	0.0123457	3	31	0	7	31	1
Zm00001d016435	5	162237398	162237498	+	12	CHH	0.0131579	10	16	0	14	17	1
Zm00001d016435	5	162238098	162238198	+	19	CHH	0.0163934	2	28	0	3	28	2
Zm00001d016435	5	162237598	162237698	+	14	CHH	0.183908	3	25	0.161663	17	25	2
Zm00001d016435	5	162237898	162237998	+	17	CHH	0.13245	4	34	0.109043	11	34	2
Zm00001d016435	5	162237798	162237898	+	16	CHH	0.138298	4	25	0.0747423	16	25	6
Zm00001d016435	5	162237698	162237798	+	15	CHH	0.27551	4	28	0.103774	15	28	17
Zm00001d016696	5	172833214	172833314	+	11	CHH	0.133333	2	25	0.0391061	6	30	9
Zm00001d016696	5	172833314	172833414	+	12	CHH	0.421053	2	11	0.0253165	4	21	40
Zm00001d017069	5	184380554	184380654	+	17	CHH	0.0294118	2	16	0	3	23	3
Zm00001d017187	5	188284122	188284222	-	19	CHH	0.106383	2	23	0.0541667	9	27	5
Zm00001d017187	5	188284222	188284322	-	18	CHH	0.278846	3	32	0.140893	9	32	14
Zm00001d017279	5	191538671	191538771	+	17	CHH	0.0144928	2	29	0	4	7	1
Zm00001d017279	5	191538771	191538871	+	18	CHH	0.0434783	2	10	0	4	2	4
Zm00001d017438	5	195877400	195877500	+	2	CHH	0.0508475	3	23	0	2	13	5
Zm00001d017438	5	195878700	195878800	+	15	CHH	0.0555556	5	4	0	10	4	6
Zm00001d020147	7	95575145	95575245	+	6	CHH	0.0947137	14	32	0.0431655	13	32	5
Zm00001d020147	7	95575345	95575445	+	8	CHH	0.0888889	3	17	0.030303	7	19	6
Zm00001d020147	7	95576145	95576245	+	16	CHH	0.30102	6	33	0.22905	5	33	7
Zm00001d020147	7	95576045	95576145	+	15	CHH	0.146667	5	28	0.0675676	8	28	8
Zm00001d020163	7	96652674	96652774	-	7	CHH	0.0657895	2	32	0.015625	4	32	5
Zm00001d020280	7	103983252	103983352	-	8	CHH	0.0411765	5	33	0.0231214	5	33	2
Zm00001d020280	7	103982552	103982652	-	15	CHH	0.25641	11	22	0.232558	10	22	2
Zm00001d020280	7	103983352	103983452	-	7	CHH	0.0366379	13	36	0.00997506	11	36	3
Zm00001d020280	7	103982952	103983052	-	11	CHH	0.0444444	4	23	0.0120482	11	23	3
Zm00001d020280	7	103982752	103982852	-	13	CHH	0.104348	5	25	0.0693069	12	25	4
Zm00001d020537	7	121397810	121397910	-	1	CHH	0.0286885	9	27	0.012766	26	27	2
Zm00001d020537	7	121397710	121397810	-	2	CHH	0.0363636	3	18	0.0100756	22	18	3
Zm00001d020537	7	121396910	121397010	-	10	CHH	0.166667	2	6	0	2	23	17
Zm00001d020578	7	123566318	123566418	-	5	CHH	0.0352941	3	27	0.00873362	8	28	3
Zm00001d020578	7	123566618	123566718	-	2	CHH	0.06	3	15	0.0286458	13	29	3
Zm00001d020578	7	123566018	123566118	-	8	CHH	0.0666667	3	6	0	2	9	7
Zm00001d020691	7	128618485	128618585	+	20	CHH	0.0606061	4	28	0.0392157	6	17	2
Zm00001d020691	7	128618385	128618485	+	19	CHH	0.265823	4	20	0.190476	4	20	8
Zm00001d020921	7	136607577	136607677	+	5	CHH	0.012987	4	19	0	7	14	1
Zm00001d020921	7	136607377	136607477	+	3	CHH	0.0343643	8	38	0.0102564	5	36	2
Zm00001d020921	7	136607277	136607377	+	2	CHH	0.206983	15	26	0.151613	12	26	6
Zm00001d020921	7	136608577	136608677	+	15	CHH	0.342857	2	21	0.272727	2	21	7
Zm00001d020921	7	136607177	136607277	+	1	CHH	0.345059	19	31	0.242881	19	31	10
Zm00001d021200	7	145765618	145765718	+	16	CHH	0.246914	4	23	0.107527	4	23	14
Zm00001d021337	7	149227012	149227112	-	17	CHH	0.192737	10	36	0.137482	19	36	6
Zm00001d021634	7	158643802	158643902	+	5	CHH	0.0431328	19	46	0.0301974	19	46	1
Zm00001d021634	7	158644702	158644802	+	14	CHH	0.131148	2	31	0.115385	4	36	2
Zm00001d021634	7	158644402	158644502	+	11	CHH	0.10687	4	30	0.0802139	6	32	3
Zm00001d021634	7	158644002	158644102	+	7	CHH	0.0674157	10	36	0.0325444	9	36	3
Zm00001d021634	7	158644602	158644702	+	13	CHH	0.125	4	9	0.0731707	5	9	5
Zm00001d021634	7	158643502	158643602	+	2	CHH	0.0595238	3	26	0	5	29	6
Zm00001d021652	7	159150423	159150523	+	17	CHH	0.0333333	3	21	0.012987	3	27	2
Zm00001d021652	7	159149823	159149923	+	11	CHH	0.264706	3	10	0.20202	4	24	6
Zm00001d021652	7	159150123	159150223	+	14	CHH	0.19697	3	21	0.10582	9	21	9
Zm00001d021653	7	159159202	159159302	-	5	CHH	0.010101	3	33	0	2	25	1
Zm00001d021667	7	159560971	159561071	+	18	CHH	0.136201	7	42	0.125874	7	42	1
Zm00001d021667	7	159559371	159559471	+	2	CHH	0.0744681	11	26	0.0620155	5	26	1
Zm00001d021667	7	159559671	159559771	+	5	CHH	0.0357143	3	27	0	3	15	4
Zm00001d021667	7	159559471	159559571	+	3	CHH	0.167742	6	28	0.0724638	3	27	10
Zm00001d021667	7	159560871	159560971	+	17	CHH	0.550847	5	26	0.431694	7	26	12
Zm00001d021667	7	159560771	159560871	+	16	CHH	0.382353	2	18	0.242236	9	18	14
Zm00001d021667	7	159559571	159559671	+	4	CHH	0.151163	3	27	0	2	27	15
Zm00001d021667	7	159560671	159560771	+	15	CHH	0.680556	3	25	0.468571	7	25	21
Zm00001d022374	7	176278939	176279039	-	15	CHH	0.222222	2	5	0.0384615	2	16	18
Zm00001d022637	7	181978808	181978908	-	17	CHH	0.105	10	21	0.0867925	25	21	2
Zm00001d022637	7	181980308	181980408	-	2	CHH	0.0405405	3	23	0.0196078	3	19	2
Zm00001d022637	7	181978708	181978808	-	18	CHH	0.184713	7	22	0.147436	20	24	4
Zm00001d023242	10	1295671	1295771	-	7	CHH	0.0416667	2	14	0	4	20	4
Zm00001d023450	10	5908057	5908157	-	4	CHH	0.180723	9	28	0.161473	13	28	2
Zm00001d023450	10	5908357	5908457	-	1	CHH	0.299517	8	27	0.249337	14	27	5
Zm00001d023450	10	5908157	5908257	-	3	CHH	0.330472	16	15	0.278571	19	15	5
Zm00001d023450	10	5908257	5908357	-	2	CHH	0.486842	10	29	0.386266	16	29	10
Zm00001d023804	10	22393018	22393118	-	7	CHH	0.102703	7	27	0.0520833	7	27	5
Zm00001d023804	10	22392718	22392818	-	10	CHH	0.363636	2	7	0.217949	5	17	15
Zm00001d023870	10	25717171	25717271	-	9	CHH	0.0864198	3	29	0	2	29	9
Zm00001d023872	10	25807713	25807813	-	20	CHH	0.0155039	4	33	0.00478469	6	33	1
Zm00001d023872	10	25809213	25809313	-	5	CHH	0.0434783	2	31	0.0277778	3	31	2
Zm00001d023872	10	25809113	25809213	-	6	CHH	0.0377358	6	38	0.0148148	4	33	2
Zm00001d023887	10	26412053	26412153	+	9	CHH	0.147059	3	12	0.0652174	5	10	8
Zm00001d023887	10	26412153	26412253	+	10	CHH	0.0909091	2	6	0	2	6	9
Zm00001d023887	10	26411953	26412053	+	8	CHH	0.2	2	13	0	3	7	20
Zm00001d023994	10	35173830	35173930	+	11	CHH	0.0581395	3	25	0.0344828	3	26	2
Zm00001d023994	10	35174030	35174130	+	13	CHH	0.105691	5	27	0.0657895	3	27	4
Zm00001d023994	10	35173930	35174030	+	12	CHH	0.12	4	25	0.0588235	3	25	6
Zm00001d023994	10	35174130	35174230	+	14	CHH	0.125	2	21	0.0444444	2	21	8
Zm00001d024382	10	68272687	68272787	-	16	CHH	0.251418	23	23	0.235974	26	23	2
Zm00001d024382	10	68273087	68273187	-	12	CHH	0.0784314	10	26	0.0606742	17	26	2
Zm00001d024382	10	68272987	68273087	-	13	CHH	0.05	25	35	0.0308748	33	35	2
Zm00001d024382	10	68272887	68272987	-	14	CHH	0.0366492	26	37	0.013363	36	37	2
Zm00001d024382	10	68272787	68272887	-	15	CHH	0.0803571	22	30	0.0537634	31	30	3
Zm00001d024382	10	68273487	68273587	-	8	CHH	0.0980392	3	15	0.030303	2	14	7
Zm00001d024786	10	88286103	88286203	+	16	CHH	0.0114943	5	16	0	7	16	1
Zm00001d025247	10	110941381	110941481	+	17	CHH	0.0144231	6	34	0	3	33	1
Zm00001d025707	10	126902969	126903069	+	11	CHH	0.128571	9	30	0.11236	9	30	2
Zm00001d025707	10	126903569	126903669	+	17	CHH	0.540909	7	31	0.521472	5	31	2
Zm00001d025707	10	126903769	126903869	+	19	CHH	0.0255102	6	32	0	2	31	3
Zm00001d025707	10	126903669	126903769	+	18	CHH	0.0974576	9	25	0.0714286	6	25	3
Zm00001d025707	10	126902269	126902369	+	4	CHH	0.130841	3	32	0.103448	6	34	3
Zm00001d025707	10	126902169	126902269	+	3	CHH	0.147368	7	14	0.1	9	14	5
Zm00001d025707	10	126903469	126903569	+	16	CHH	0.102041	4	14	0	3	27	10
Zm00001d025885	10	133021487	133021587	+	13	CHH	0.132353	5	38	0.115741	6	38	2
Zm00001d025885	10	133021987	133022087	+	18	CHH	0.0172414	2	27	0	2	27	2
Zm00001d025885	10	133021387	133021487	+	12	CHH	0.06875	18	27	0.0461538	17	27	2
Zm00001d025885	10	133020387	133020487	+	2	CHH	0.0227273	8	11	0	11	13	2
Zm00001d025885	10	133020687	133020787	+	5	CHH	0.0555556	12	23	0.0109091	12	23	4
Zm00001d025885	10	133021087	133021187	+	9	CHH	0.113709	28	34	0.0584862	26	34	6
Zm00001d026016	10	136071232	136071332	+	13	CHH	0.0535714	3	33	0.0432692	6	33	1
Zm00001d026016	10	136071532	136071632	+	16	CHH	0.0517241	6	29	0.0398406	9	29	1
Zm00001d026016	10	136070932	136071032	+	10	CHH	0.0666667	3	24	0.0434783	4	24	2
Zm00001d026016	10	136070532	136070632	+	6	CHH	0.0416667	7	32	0.0151515	8	32	3
Zm00001d026016	10	136071432	136071532	+	15	CHH	0.0588235	6	9	0.0169492	4	33	4
Zm00001d026016	10	136071632	136071732	+	17	CHH	0.135593	3	19	0.0728155	7	29	6
Zm00001d026016	10	136070232	136070332	+	3	CHH	0.117647	2	9	0	2	25	12
Zm00001d026016	10	136071132	136071232	+	12	CHH	0.147541	6	20	0.0227273	4	20	12
Zm00001d026486	10	146893286	146893386	+	11	CHH	0.153191	7	33	0.117949	18	33	4
Zm00001d026486	10	146892286	146892386	+	1	CHH	0.0740741	2	26	0.0177515	7	26	6
Zm00001d026486	10	146893186	146893286	+	10	CHH	0.122172	7	30	0.0438799	14	30	8
Zm00001d026486	10	146893386	146893486	+	12	CHH	0.0983607	2	28	0.0151057	9	35	8
Zm00001d026530	10	147744935	147745035	-	7	CHH	0.0104167	3	30	0	2	30	1
Zm00001d026530	10	147743735	147743835	-	19	CHH	0.0133333	2	40	0	2	5	1
Zm00001d026542	10	147947097	147947197	-	4	CHH	0.0181818	2	25	0	2	25	2
Zm00001d026542	10	147946797	147946897	-	7	CHH	0.111111	2	9	0.0121951	3	29	10
Zm00001d026594	10	148669097	148669197	+	12	CHH	0.0625	3	16	0.043956	7	26	2
Zm00001d026594	10	148668797	148668897	+	9	CHH	0.0434783	5	32	0.015015	10	32	3
Zm00001d026594	10	148668697	148668797	+	8	CHH	0.0491803	3	24	0.0144404	8	33	3
Zm00001d026594	10	148669297	148669397	+	14	CHH	0.0769231	2	16	0	2	26	8
Zm00001d026594	10	148668597	148668697	+	7	CHH	0.25	3	8	0.147059	4	23	10
Zm00001d027320	1	2889651	2889751	-	18	CHH	0.208333	8	3	0.15493	8	27	5
Zm00001d027320	1	2889551	2889651	-	19	CHH	0.235294	3	11	0.015873	7	35	22
Zm00001d027899	1	17142730	17142830	-	9	CHH	0.0185185	3	19	0	4	21	2
Zm00001d028025	1	20838015	20838115	-	4	CHH	0.029703	5	22	0.0147783	11	19	1
Zm00001d028025	1	20837615	20837715	-	8	CHH	0.0357143	3	22	0.00636943	6	25	3
Zm00001d028025	1	20837915	20838015	-	5	CHH	0.0634921	5	25	0.0235294	10	25	4
Zm00001d028025	1	20838115	20838215	-	3	CHH	0.0925926	3	21	0.0347826	5	21	6
Zm00001d028510	1	37503881	37503981	-	5	CHH	0.0333333	2	16	0	3	24	3
Zm00001d028754	1	45596413	45596513	+	16	CHH	0.055	5	40	0.0147783	5	40	4
Zm00001d028754	1	45596313	45596413	+	15	CHH	0.221239	8	28	0.132597	6	28	9
Zm00001d028754	1	45596113	45596213	+	13	CHH	0.194444	4	30	0.101604	6	30	9
Zm00001d028754	1	45596213	45596313	+	14	CHH	0.423729	6	19	0.301205	9	19	12
Zm00001d028793	1	46500694	46500794	-	7	CHH	0.0357143	6	26	0.025	20	26	1
Zm00001d028793	1	46500794	46500894	-	6	CHH	0.057971	4	19	0.0436364	14	19	1
Zm00001d028793	1	46500094	46500194	-	13	CHH	0.124294	6	32	0.0985507	11	32	3
Zm00001d028793	1	46499794	46499894	-	16	CHH	0.0742358	7	31	0.0295858	5	32	4
Zm00001d028793	1	46499894	46499994	-	15	CHH	0.414414	12	19	0.368421	8	19	5
Zm00001d028793	1	46500494	46500594	-	9	CHH	0.0629371	6	24	0.0152801	25	24	5
Zm00001d028793	1	46499994	46500094	-	14	CHH	0.139037	10	18	0.037234	10	18	10
Zm00001d028953	1	52749864	52749964	-	19	CHH	0.015873	2	27	0	2	33	2
Zm00001d029859	1	90821308	90821408	-	11	CHH	0.0733945	8	29	0.035461	15	29	4
Zm00001d029859	1	90821608	90821708	-	8	CHH	0.056338	4	19	0.0153846	14	23	4
Zm00001d029859	1	90821808	90821908	-	6	CHH	0.4	3	2	0.031746	4	18	37
Zm00001d029913	1	93847017	93847117	+	19	CHH	0.0183486	4	28	0	4	28	2
Zm00001d029913	1	93846317	93846417	+	12	CHH	0.294118	2	8	0.102564	2	24	19
Zm00001d031303	1	185700078	185700178	+	18	CHH	0.0421053	11	27	0.0304348	17	27	1
Zm00001d031303	1	185699978	185700078	+	17	CHH	0.0888031	8	33	0.0416667	15	33	5
Zm00001d031303	1	185699878	185699978	+	16	CHH	0.224138	5	25	0.135922	16	25	9
Zm00001d031653	1	197493276	197493376	+	8	CHH	0.0326797	4	38	0.0138889	5	32	2
Zm00001d031659	1	197759894	197759994	+	18	CHH	0.0673077	3	33	0.0148148	4	33	5
Zm00001d031659	1	197759694	197759794	+	16	CHH	0.632479	6	21	0.537313	6	21	10
Zm00001d031701	1	198851167	198851267	-	4	CHH	0.0897436	4	21	0.0654206	5	23	2
Zm00001d031701	1	198851467	198851567	-	1	CHH	0.101695	5	13	0.0724638	5	13	3
Zm00001d031701	1	198849767	198849867	-	18	CHH	0.1	2	5	0	5	14	10
Zm00001d031701	1	198849867	198849967	-	17	CHH	0.166667	2	3	0	4	23	17
Zm00001d032495	1	228404353	228404453	+	17	CHH	0.0103093	5	20	0	2	20	1
Zm00001d032688	1	234478421	234478521	-	8	CHH	0.0108696	4	24	0	7	24	1
Zm00001d032688	1	234477721	234477821	-	15	CHH	0.031746	2	27	0	3	25	3
Zm00001d032973	1	245142720	245142820	+	13	CHH	0.5	2	13	0.213115	3	22	29
Zm00001d033024	1	247479302	247479402	-	2	CHH	0.0294118	3	11	0	2	11	3
Zm00001d033319	1	258879891	258879991	-	17	CHH	0.0645161	2	16	0	2	22	6
Zm00001d033634	1	269326864	269326964	+	9	CHH	0.15	2	12	0.0526316	2	8	10
Zm00001d033634	1	269326564	269326664	+	6	CHH	0.486486	3	29	0.263566	4	29	22
Zm00001d033790	1	273752667	273752767	+	2	CHH	0.0784314	2	28	0.0467836	6	28	3
Zm00001d034017	1	281245656	281245756	+	5	CHH	0.02	2	28	0	3	32	2
Zm00001d034067	1	283064187	283064287	+	7	CHH	0.0506329	3	26	0.0277778	2	24	2
Zm00001d034067	1	283064087	283064187	+	6	CHH	0.030303	3	35	0	2	35	3
Zm00001d034143	1	285006207	285006307	+	1	CHH	0.0689655	2	16	0	2	43	7
Zm00001d034298	1	288726538	288726638	-	7	CHH	0.0666667	2	23	0	3	20	7
Zm00001d034298	1	288726238	288726338	-	10	CHH	0.182432	5	27	0.0727273	4	27	11
Zm00001d034692	1	300144968	300145068	+	14	CHH	0.0614887	11	29	0.0460358	13	29	2
Zm00001d034692	1	300144768	300144868	+	12	CHH	0.0208333	4	26	0.004329	9	26	2
Zm00001d034692	1	300144668	300144768	+	11	CHH	0.0298507	3	25	0	3	18	3
Zm00001d034715	1	300524932	300525032	+	3	CHH	0.0138889	7	20	0	8	24	1
Zm00001d034715	1	300525032	300525132	+	4	CHH	0.125	2	4	0	5	15	13
Zm00001d034851	1	303806084	303806184	+	7	CHH	0.0909091	3	15	0.078125	4	18	1
Zm00001d034851	1	303806284	303806384	+	9	CHH	0.0175439	2	27	0	4	11	2
Zm00001d034851	1	303805884	303805984	+	5	CHH	0.0446429	4	25	0.00632911	9	17	4
Zm00001d034851	1	303806184	303806284	+	8	CHH	0.136364	2	24	0.097561	3	24	4
Zm00001d035243	6	16652831	16652931	+	18	CHH	0.363743	20	42	0.309589	26	42	5
Zm00001d035629	6	37511545	37511645	-	6	CHH	0.037037	2	14	0.025641	2	26	1
Zm00001d037210	6	115966370	115966470	+	7	CHH	0.0892857	2	29	0.0333333	2	16	6
Zm00001d037495	6	127262397	127262497	-	17	CHH	0.191489	2	23	0.136364	3	15	6
Zm00001d037495	6	127262997	127263097	-	11	CHH	0.241379	3	11	0.08	2	14	16
Zm00001d037784	6	137680142	137680242	+	16	CHH	0.0869565	2	20	0.0737705	18	20	1
Zm00001d037784	6	137678742	137678842	+	2	CHH	0.030303	2	14	0.0160428	5	35	1
Zm00001d037784	6	137680242	137680342	+	17	CHH	0.245902	12	21	0.153846	32	21	9
Zm00001d037892	6	141261913	141262013	-	14	CHH	0.0625	3	20	0.0263158	2	21	4
Zm00001d037892	6	141262013	141262113	-	13	CHH	0.184211	2	20	0.0869565	2	25	10
Zm00001d038019	6	145388148	145388248	-	19	CHH	0.032967	7	25	0.0185185	11	25	1
Zm00001d038019	6	145388048	145388148	-	20	CHH	0.0147059	2	32	0	2	17	1
Zm00001d038019	6	145388248	145388348	-	18	CHH	0.0286885	8	29	0.0116279	12	29	2
Zm00001d038718	6	163326812	163326912	-	10	CHH	0.138889	6	34	0.12766	4	34	1
Zm00001d038718	6	163326912	163327012	-	9	CHH	0.153285	7	20	0.0869565	3	22	7
Zm00001d038718	6	163326312	163326412	-	15	CHH	0.0888889	3	17	0	3	12	9
Zm00001d038718	6	163326012	163326112	-	18	CHH	0.491667	4	27	0.322368	6	26	17
Zm00001d039081	6	169700092	169700192	-	2	CHH	0.0735294	2	34	0.00518135	6	35	7
Zm00001d039378	3	2790182	2790282	+	11	CHH	0.0166667	3	42	0	3	27	2
Zm00001d039378	3	2790682	2790782	+	16	CHH	0.0294118	2	20	0	3	25	3
Zm00001d039378	3	2789682	2789782	+	6	CHH	0.0833333	2	6	0	4	6	8
Zm00001d039414	3	3811237	3811337	+	3	CHH	0.01	4	27	0	4	27	1
Zm00001d039414	3	3811437	3811537	+	5	CHH	0.0119048	5	17	0	3	17	1
Zm00001d039414	3	3812337	3812437	+	14	CHH	0.277778	2	16	0.182609	7	16	10
Zm00001d039414	3	3812237	3812337	+	13	CHH	0.392857	2	18	0.0952381	4	10	30
Zm00001d039946	3	20165523	20165623	+	1	CHH	0.111597	14	32	0.0832049	20	32	3
Zm00001d039946	3	20166323	20166423	+	9	CHH	0.313725	3	15	0.283784	3	26	3
Zm00001d039946	3	20165723	20165823	+	3	CHH	0.22963	6	22	0.165468	6	25	6
Zm00001d039946	3	20166423	20166523	+	10	CHH	0.291667	3	9	0.108696	2	25	18
Zm00001d040441	3	43538912	43539012	+	20	CHH	0.025641	3	28	0	4	14	3
Zm00001d041404	3	117198258	117198358	+	13	CHH	0.010101	9	21	0	4	17	1
Zm00001d041404	3	117198358	117198458	+	14	CHH	0.0101523	8	24	0	3	16	1
Zm00001d041663	3	132593558	132593658	+	5	CHH	0.0263158	2	19	0.015873	5	24	1
Zm00001d041663	3	132594658	132594758	+	16	CHH	0.0578035	19	27	0.04375	18	27	1
Zm00001d041663	3	132593458	132593558	+	4	CHH	0.0333333	2	33	0.0171429	5	36	2
Zm00001d041663	3	132594158	132594258	+	11	CHH	0.0163934	3	19	0	3	18	2
Zm00001d041663	3	132594758	132594858	+	17	CHH	0.0984456	10	20	0.0361446	8	20	6
Zm00001d041769	3	136878212	136878312	-	14	CHH	0.107143	2	17	0.0512821	3	15	6
Zm00001d041927	3	143911629	143911729	-	20	CHH	0.163934	3	19	0.145833	3	18	2
Zm00001d041927	3	143913429	143913529	-	2	CHH	0.15534	14	36	0.124105	23	36	3
Zm00001d041927	3	143913229	143913329	-	4	CHH	0.0595238	2	34	0.0169972	10	36	4
Zm00001d041927	3	143912129	143912229	-	15	CHH	0.367347	3	16	0.25	8	28	12
Zm00001d041927	3	143913529	143913629	-	1	CHH	0.338501	16	24	0.184615	30	24	15
Zm00001d041927	3	143912429	143912529	-	12	CHH	0.210526	2	20	0.0163934	3	18	19
Zm00001d042141	3	153352928	153353028	+	2	CHH	0.0612245	2	23	0	2	23	6
Zm00001d042317	3	160731027	160731127	+	9	CHH	0.025	2	20	0.0142857	2	36	1
Zm00001d042317	3	160730727	160730827	+	6	CHH	0.0625	2	9	0.047619	2	20	1
Zm00001d042317	3	160730327	160730427	+	2	CHH	0.0544554	6	35	0.0304348	7	35	2
Zm00001d043047	3	187348083	187348183	-	19	CHH	0.0333333	3	11	0	3	18	3
Zm00001d043244	3	193003185	193003285	-	20	CHH	0.0147059	2	30	0	2	30	1
Zm00001d043520	3	202664480	202664580	-	14	CHH	0.404145	14	27	0.381857	18	27	2
Zm00001d043520	3	202664380	202664480	-	15	CHH	0.546296	10	21	0.416404	15	21	13
Zm00001d043581	3	204413899	204413999	+	8	CHH	0.0142857	2	41	0	4	31	1
Zm00001d043581	3	204414499	204414599	+	14	CHH	0.0657895	5	14	0	2	32	7
Zm00001d043581	3	204414599	204414699	+	15	CHH	0.076087	2	40	0	3	21	8
Zm00001d043581	3	204414399	204414499	+	13	CHH	0.102941	4	19	0	2	30	10
Zm00001d043581	3	204414699	204414799	+	16	CHH	0.155556	3	30	0.0357143	3	30	12
Zm00001d043742	3	208851113	208851213	-	14	CHH	0.0227273	2	21	0	2	18	2
Zm00001d043780	3	209998801	209998901	+	6	CHH	0.0986842	4	37	0.0333333	5	37	7
Zm00001d043780	3	209998901	209999001	+	7	CHH	0.436364	2	30	0.0995475	7	30	34
Zm00001d044021	3	216967619	216967719	+	19	CHH	0.159091	3	30	0.145098	9	29	1
Zm00001d044021	3	216967419	216967519	+	17	CHH	0.16	9	32	0.108392	9	32	5
Zm00001d044021	3	216967519	216967619	+	18	CHH	0.203125	4	16	0.103896	7	21	10
Zm00001d044465	3	228902935	228903035	+	12	CHH	0.0411523	8	31	0.0294118	13	31	1
Zm00001d044465	3	228903235	228903335	+	15	CHH	0.227273	19	26	0.192698	19	26	3
Zm00001d044465	3	228903035	228903135	+	13	CHH	0.0639344	22	28	0.026699	15	28	4
Zm00001d044465	3	228903335	228903435	+	16	CHH	0.234848	7	40	0.188963	15	41	5
Zm00001d044476	3	229148364	229148464	-	19	CHH	0.0291971	5	28	0.011236	5	19	2
Zm00001d044579	3	232299513	232299613	-	7	CHH	0.0326087	3	27	0	7	11	3
Zm00001d044640	3	233816308	233816408	+	16	CHH	0.0188679	2	26	0	2	24	2
Zm00001d044640	3	233816208	233816308	+	15	CHH	0.139535	2	23	0.027027	2	21	11
Zm00001d044640	3	233815408	233815508	+	7	CHH	0.153846	2	6	0.0238095	3	33	13
Zm00001d044683	3	234823465	234823565	+	12	CHH	0.0559006	9	18	0.0416667	7	18	1
Zm00001d044683	3	234824265	234824365	+	20	CHH	0.0272727	12	9	0	4	21	3
Zm00001d044683	3	234823365	234823465	+	11	CHH	0.0602837	10	29	0.0247934	8	29	4
Zm00001d044683	3	234823265	234823365	+	10	CHH	0.044586	7	22	0.00813008	6	22	4
Zm00001d044683	3	234822865	234822965	+	6	CHH	0.0923077	4	17	0.0446429	13	17	5
Zm00001d044970	9	8483173	8483273	-	9	CHH	0.112069	11	33	0.100334	9	33	1
Zm00001d044970	9	8483473	8483573	-	6	CHH	0.0453172	11	30	0.032641	11	30	1
Zm00001d044970	9	8483273	8483373	-	8	CHH	0.120332	15	33	0.0664336	9	33	5
Zm00001d044970	9	8482973	8483073	-	11	CHH	0.132353	4	16	0.0212766	6	17	11
Zm00001d044970	9	8483073	8483173	-	10	CHH	0.436242	7	20	0.304348	7	20	13
Zm00001d045423	9	21634234	21634334	-	12	CHH	0.260638	6	33	0.243523	6	33	2
Zm00001d045423	9	21634434	21634534	-	10	CHH	0.105263	2	12	0.0526316	7	18	5
Zm00001d045423	9	21634334	21634434	-	11	CHH	0.209302	3	13	0.145631	7	14	6
Zm00001d045423	9	21634734	21634834	-	7	CHH	0.25	2	15	0.16	2	22	9
Zm00001d045423	9	21634534	21634634	-	9	CHH	0.275	2	20	0.173077	7	21	10
Zm00001d045423	9	21634634	21634734	-	8	CHH	0.447761	3	21	0.330579	6	21	12
Zm00001d045432	9	21985414	21985514	-	10	CHH	0.0196078	2	28	0	2	12	2
Zm00001d045685	9	33210280	33210380	-	10	CHH	0.040404	4	27	0.015873	5	23	2
Zm00001d045685	9	33210480	33210580	-	8	CHH	0.470588	2	21	0.411765	2	21	6
Zm00001d045685	9	33210780	33210880	-	5	CHH	0.266187	5	27	0.202439	15	27	6
Zm00001d045685	9	33210380	33210480	-	9	CHH	0.608696	2	42	0.504132	3	37	10
Zm00001d046134	9	65714013	65714113	+	6	CHH	0.0983607	2	34	0.0588235	5	31	4
Zm00001d046317	9	80083503	80083603	+	17	CHH	0.0125	7	11	0	3	31	1
Zm00001d046667	9	101397197	101397297	+	11	CHH	0.0185185	2	22	0	4	22	2
Zm00001d046667	9	101396497	101396597	+	4	CHH	0.0588235	2	11	0.0288462	5	23	3
Zm00001d046667	9	101397797	101397897	+	17	CHH	0.3125	3	12	0.210084	5	26	10
Zm00001d046667	9	101396797	101396897	+	7	CHH	0.254902	3	18	0.145299	4	29	11
Zm00001d046667	9	101396597	101396697	+	5	CHH	0.298246	3	22	0.129032	5	29	17
Zm00001d046667	9	101396697	101396797	+	6	CHH	0.405941	4	26	0.16835	8	36	24
Zm00001d046995	9	114408109	114408209	+	18	CHH	0.0196078	3	34	0	7	9	2
Zm00001d046995	9	114407609	114407709	+	13	CHH	0.217899	7	37	0.197044	11	37	2
Zm00001d046995	9	114407109	114407209	+	8	CHH	0.0277778	2	15	0	2	14	3
Zm00001d046995	9	114406809	114406909	+	5	CHH	0.0294118	3	30	0	3	31	3
Zm00001d047090	9	118161158	118161258	+	17	CHH	0.176471	2	21	0.150685	3	22	3
Zm00001d047186	9	121314686	121314786	+	20	CHH	0.011236	7	13	0	7	21	1
Zm00001d047186	9	121313886	121313986	+	12	CHH	0.113636	2	20	0.0663717	11	20	5
Zm00001d047186	9	121312886	121312986	+	2	CHH	0.244898	5	20	0.195652	5	20	5
Zm00001d047186	9	121313986	121314086	+	13	CHH	0.142857	2	20	0.035	10	20	11
Zm00001d047186	9	121313286	121313386	+	6	CHH	0.133333	3	9	0	2	17	13
Zm00001d047252	9	124157278	124157378	+	17	CHH	0.121053	8	25	0.101928	15	25	2
Zm00001d047252	9	124157178	124157278	+	16	CHH	0.202151	22	21	0.153696	24	21	5
Zm00001d047441	9	130330749	130330849	+	3	CHH	0.037037	2	32	0.0186916	3	32	2
Zm00001d047441	9	130332049	130332149	+	16	CHH	0.08	2	23	0.0227273	3	15	6
Zm00001d047441	9	130331949	130332049	+	15	CHH	0.258065	2	29	0.0461538	5	14	21
Zm00001d047671	9	138751208	138751308	+	6	CHH	0.0263158	15	27	0.00952381	31	27	2
Zm00001d047671	9	138751108	138751208	+	5	CHH	0.027933	6	31	0.00524934	12	31	2
Zm00001d047671	9	138751008	138751108	+	4	CHH	0.075	2	36	0.0518519	4	36	2
Zm00001d047671	9	138751808	138751908	+	12	CHH	0.311377	15	22	0.255776	28	22	6
Zm00001d047796	9	141983957	141984057	-	2	CHH	0.16087	25	28	0.0997375	27	28	6
Zm00001d047796	9	141984057	141984157	-	1	CHH	0.193347	19	25	0.110039	21	25	8
Zm00001d048593	4	919907	920007	+	4	CHH	0.0151515	2	36	0	3	28	2
Zm00001d048593	4	920907	921007	+	14	CHH	0.0208333	2	29	0	2	23	2
Zm00001d048669	4	3055793	3055893	+	3	CHH	0.0571429	10	7	0.0246305	5	39	3
Zm00001d048669	4	3055993	3056093	+	5	CHH	0.0888889	2	21	0.0192308	4	29	7
Zm00001d048669	4	3055893	3055993	+	4	CHH	0.166667	5	9	0.0578512	7	17	11
Zm00001d049020	4	12828770	12828870	-	13	CHH	0.114286	2	16	0.08	3	16	3
Zm00001d049020	4	12828870	12828970	-	12	CHH	0.0555556	2	20	0.0149254	4	18	4
Zm00001d049020	4	12829170	12829270	-	9	CHH	0.225	2	19	0.0810811	3	14	14
Zm00001d049081	4	15349237	15349337	+	10	CHH	0.0467836	10	34	0.0328467	30	9	1
Zm00001d049081	4	15350137	15350237	+	19	CHH	0.030303	2	17	0	3	18	3
Zm00001d049081	4	15350037	15350137	+	18	CHH	0.0894309	5	23	0.0526316	4	23	4
Zm00001d049081	4	15349137	15349237	+	9	CHH	0.08	13	34	0.0366133	17	26	4
Zm00001d049081	4	15349837	15349937	+	16	CHH	0.13278	10	25	0.0652174	8	29	7
Zm00001d049096	4	15940160	15940260	-	11	CHH	0.02	2	30	0	3	27	2
Zm00001d049096	4	15940360	15940460	-	9	CHH	0.0222222	2	20	0	4	15	2
Zm00001d049096	4	15939560	15939660	-	17	CHH	0.0714286	2	9	0	2	12	7
Zm00001d049113	4	16450917	16451017	-	13	CHH	0.0217391	2	20	0.00588235	7	26	2
Zm00001d049113	4	16450517	16450617	-	17	CHH	0.0772201	10	25	0.0260355	34	25	5
Zm00001d049113	4	16452117	16452217	-	1	CHH	0.056338	3	25	0	2	24	6
Zm00001d049525	4	33184609	33184709	+	3	CHH	0.0412371	3	34	0.0278441	31	40	1
Zm00001d049525	4	33184809	33184909	+	5	CHH	0.0677966	4	29	0.0532213	11	32	1
Zm00001d049525	4	33184709	33184809	+	4	CHH	0.115385	5	27	0.0460526	28	27	7
Zm00001d049625	4	37978379	37978479	-	12	CHH	0.105263	2	25	0.059322	5	23	5
Zm00001d049657	4	38893637	38893737	-	6	CHH	0.0833333	4	12	0.0714286	2	18	1
Zm00001d049657	4	38892737	38892837	-	15	CHH	0.168067	4	30	0.155894	9	30	1
Zm00001d049657	4	38892937	38893037	-	13	CHH	0.0805861	9	32	0.0626781	11	32	2
Zm00001d049657	4	38893337	38893437	-	9	CHH	0.0633484	7	34	0.04	4	34	2
Zm00001d049657	4	38893037	38893137	-	12	CHH	0.110727	7	41	0.0772532	6	41	3
Zm00001d049657	4	38892537	38892637	-	17	CHH	0.0505051	3	30	0	3	30	5
Zm00001d049851	4	47819321	47819421	+	3	CHH	0.0544218	5	28	0.01875	5	35	4
Zm00001d049851	4	47819521	47819621	+	5	CHH	0.0701754	3	21	0.0176991	5	24	5
Zm00001d049851	4	47819221	47819321	+	2	CHH	0.142857	2	15	0.0298507	3	21	11
Zm00001d049851	4	47819921	47820021	+	9	CHH	0.166667	2	4	0	3	6	17
Zm00001d050079	4	64641852	64641952	+	16	CHH	0.0206897	4	34	0	2	30	2
Zm00001d050079	4	64641352	64641452	+	11	CHH	0.138889	2	20	0.111111	3	40	3
Zm00001d050079	4	64641752	64641852	+	15	CHH	0.0518519	5	28	0.0217391	2	21	3
Zm00001d050768	4	121766172	121766272	+	16	CHH	0.0769231	2	8	0	2	7	8
Zm00001d050889	4	128501110	128501210	-	10	CHH	0.114286	2	18	0.0851064	4	22	3
Zm00001d051062	4	140037165	140037265	+	9	CHH	0.0247788	21	27	0.0134357	19	27	1
Zm00001d051062	4	140036865	140036965	+	6	CHH	0.0247934	9	27	0.0105263	6	30	1
Zm00001d051062	4	140036765	140036865	+	5	CHH	0.0188679	3	16	0	4	16	2
Zm00001d051062	4	140036965	140037065	+	7	CHH	0.0264317	15	31	0.00483092	13	31	2
Zm00001d051062	4	140037065	140037165	+	8	CHH	0.0383912	16	35	0.0135823	17	35	2
Zm00001d051062	4	140037665	140037765	+	14	CHH	0.0556242	20	40	0.0257848	22	40	3
Zm00001d051309	4	152947610	152947710	+	17	CHH	0.0120482	8	10	0	8	10	1
Zm00001d051472	4	159917706	159917806	+	20	CHH	0.0113636	4	20	0	2	17	1
Zm00001d051474	4	159937897	159937997	+	20	CHH	0.0117647	3	26	0	2	17	1
Zm00001d051543	4	162018640	162018740	-	2	CHH	0.0277778	7	5	0	14	5	3
Zm00001d051802	4	170030059	170030159	-	20	CHH	0.0125	6	13	0	4	10	1
Zm00001d051802	4	170030759	170030859	-	13	CHH	0.025	2	24	0	3	9	3
Zm00001d052673	4	196891802	196891902	+	7	CHH	0.208333	2	16	0.0344828	3	23	17
Zm00001d052684	4	197341258	197341358	+	7	CHH	0.0481928	3	26	0.0375	3	27	1
Zm00001d052684	4	197340958	197341058	+	4	CHH	0.0666667	2	8	0	2	9	7
Zm00001d052684	4	197341458	197341558	+	9	CHH	0.134615	2	26	0.0560748	4	28	8
Zm00001d052792	4	201123661	201123761	+	8	CHH	0.0425532	2	22	0.03125	3	22	1
Zm00001d052792	4	201124261	201124361	+	14	CHH	0.277778	2	11	0.0588235	2	29	22
Zm00001d052804	4	201422209	201422309	-	17	CHH	0.0472103	24	29	0.0290758	33	29	2
Zm00001d052804	4	201422409	201422509	-	15	CHH	0.443478	14	17	0.315254	17	17	13
Zm00001d053220	4	220720201	220720301	-	5	CHH	0.0357143	2	16	0.0222222	2	25	1
Zm00001d053220	4	220720001	220720101	-	7	CHH	0.0408163	3	15	0	4	20	4
Zm00001d053220	4	220720101	220720201	-	6	CHH	0.384615	2	7	0.0967742	3	12	29
Zm00001d053225	4	220840215	220840315	+	15	CHH	0.408333	4	28	0.273973	16	28	13
Zm00001d053988	4	244693444	244693544	-	7	CHH	0.027027	3	27	0	5	27	3
